1 Manuscript title

2 **The scaffold protein IQGAP1 links heat-induced stress signals to alternative**  
3 **splicing regulation in gastric cancer cells**

4 Andrada Birladeanu<sup>1,5</sup>, Malgorzata Rogalska<sup>2,5</sup>, Myrto Potiri<sup>1,5</sup>, Vasiliki Papadaki<sup>1</sup>, Margarita  
5 Andreadou<sup>1</sup>, Dimitris Kontoyiannis<sup>1,3</sup>, Joe D. Lewis<sup>4</sup>, Zoi Erpapazoglou<sup>1</sup>, Panagiota Kafasla<sup>\*,1,6</sup>

6

7 <sup>1</sup>Institute for Fundamental Biomedical Research, B.S.R.C. "Alexander Fleming", 34 Fleming st. 16672  
8 Vari, Athens, Greece

9 <sup>2</sup>Centre de Regulació Genòmica, The Barcelona Institute of Science and Technology and Universitat  
10 Pompeu Fabra, Dr. Aiguader 88, 08003, Barcelona, Spain

11 <sup>3</sup>Department of Biology, Aristotle University of Thessaloniki, Greece

12 <sup>4</sup>European Molecular Biology Laboratory, 69117 Heidelberg, Germany

13 <sup>5</sup>These authors contributed equally to this work

14

15 \* To whom correspondence should be addressed: Email: kafasla@fleming.gr

16

17 **ABSTRACT**

18 In response to oncogenic signals, Alternative Splicing (AS) regulators such as SR and hnRNP  
19 proteins show altered expression levels, subnuclear distribution and/or post-translational modification  
20 status, but the link between signals and these changes remains unknown. Here, we report that a  
21 cytosolic scaffold protein, IQGAP1, performs this task in response to heat-induced signals. We show  
22 that in gastric cancer cells, a nuclear pool of IQGAP1 acts as a tethering module for a group of  
23 spliceosome components, including hnRNPM, a splicing factor critical for the response of the  
24 spliceosome to heat-shock. IQGAP1 controls hnRNPM's sumoylation, subnuclear localization and the  
25 relevant response of the AS machinery to heat-induced stress. Genome-wide analyses reveal that  
26 IQGAP1 and hnRNPM co-regulate the AS of a cell cycle-related RNA regulon in gastric cancer cells,  
27 thus favouring the accelerated proliferation phenotype of gastric cancer cells. Overall, we reveal a  
28 missing link between stress signals and AS regulation.

29 **INTRODUCTION**

30 In humans, more than 95% of multi-exonic genes are potentially alternatively spliced (Pan et al., 2008;  
31 Wang & Burge, 2008). As a consequence, precise modulation of Alternative Splicing (AS) is essential  
32 for shaping the proteome of any given cell and altered physiological conditions can change cellular  
33 function via AS reprogramming (Heyd & Lynch, 2011). The importance of accurate AS in health and  
34 disease, including cancer, has been well documented (Cherry & Lynch, 2020; El Marabti & Younis,  
35 2018; Kahles et al., 2018; Oltean & Bates, 2013; Sveen et al., 2015). Oncogenic signalling pathways  
36 such as JNK, MEK, or AKT alter the expression and/or activity of splicing regulatory proteins (Cherry  
37 & Lynch, 2020; Matter et al., 2002). For example, phosphorylation of Serine-Arginine-rich (SR)

38 proteins, a post-translational modification that largely regulates their splicing activity, is enhanced in  
39 the presence of growth factors such as EGF, through AKT activation (Blaustein et al., 2005; Zhihong  
40 Zhou et al., 2012). Furthermore, inhibition of PI3K/mTOR signalling by the chemotherapeutic agent  
41 BEZ235 alters the subcellular distribution of the splicing regulator heterogeneous nuclear  
42 ribonucleoprotein M (hnRNPM), thus affecting its activity in AS regulation in Ewing sarcoma cells  
43 (Passacantilli et al., 2017).

44 Most existing data linking AS, signaling and cancer comes from cases where localization, expression,  
45 or post-translational modifications of specific splicing factors such as SR proteins or hnRNPs are  
46 altered (Cherry & Lynch, 2020). However, information is completely missing on how the signal is  
47 decoded in the nucleus and thereafter dictates the necessary post-translational modifications of  
48 splicing factors or their subnuclear rearrangement. In the cytoplasm, signalling integrators such as the  
49 scaffold proteins spatially organise the signalling enzymes and thus guide the flow of molecular  
50 information (Langeberg & Scott, 2015). Via organising protein-protein interaction modules, in specific  
51 subcellular locations, they bring multiple binding partners together to facilitate their concerted  
52 interactions and functions (Garbett & Bretscher, 2014). In the nucleus, a few cases have been  
53 identified, such as the ubiquitylation or acetylation scaffolds, San1 and ATAC, involved in nuclear  
54 protein quality control and transcriptional regulation, respectively (Rosenbaum et al., 2011; Suganuma  
55 et al., 2010). However, there is absolutely no information on how distinct signals are transduced to the  
56 splicing machinery and how subsequent AS regulation, that relies on the post-translational  
57 modifications of splicing factors and/or their change in localization, takes place.

58 In our search for signal transducers to the splicing complexes, and while studying the composition of  
59 hnRNP complexes in different mouse and human cell lines, we came across the scaffold protein  
60 IQGAP1 (IQ Motif Containing GTPase Activating Protein 1) in LC-MS/MS data. This finding agreed  
61 with data from the Lamond and Mann laboratories (Lières et al., 2010; Rappsilber et al., 2002) where  
62 IQGAP1 had also been detected as a component of distinct spliceosomal complexes by LC-MS/MS  
63 analyses.

64 Here, we present conclusive evidence on the participation of the scaffold protein IQGAP1 in nuclear  
65 ribonucleoprotein complexes that control AS regulation in gastric cancer cells. They accomplish this  
66 by controlling the subcellular distribution and the post-translation modification status of AS regulatory  
67 proteins. Cytoplasmic IQGAP1 acts as a signal integrator in a number of signalling pathways,  
68 including MEK and AKT cascades, but there is no defined role for the nuclear pool of IQGAP1 (Smith  
69 et al., 2015). With *IQGAP1* mRNA being overexpressed in many malignant cell types, the protein  
70 seems to regulate cancer growth and metastatic potential (Hu et al., 2019; Osman et al., 2013; White  
71 et al., 2009). Moreover, aged mice lacking IQGAP1 develop gastric hyperplasia suggesting an  
72 important *in vivo* role for IQGAP1 in maintaining the gastric epithelium (Li et al., 2000).

73 We show here that IQGAP1 is a component of nuclear RNPs with a deterministic role in AS regulation  
74 of a cell cycle related RNA regulon in gastric cancer, a cancer type that has been associated with a  
75 significantly high incidence of AS changes (Kahles et al., 2018; Sveen et al., 2015). We show that

76 IQGAP1 is necessary for the response of the splicing machinery to heat induced signals in gastric  
77 cancer cells. Heat-stress-dependent inhibition of splicing has been well documented and is known to  
78 disrupt mainly post-transcriptional splicing events, with the subnuclear location of splicing being a  
79 critical component of the response to this stress (Shalgi et al., 2014). We show that IQGAP1 is  
80 necessary for changes of the splicing machinery that take place upon heat-shock, and this is reflected  
81 to the AS pattern of a minigene reporter. Focusing on the interaction of IQGAP1 with hnRNPM, a  
82 known splicing regulator (Gattoni et al., 1996; Panayiota Kafasla et al., 2002) that responds to heat-  
83 shock by moving away from spliceosomal complexes (Gattoni et al., 1996; Llères et al., 2010), we  
84 show that this response does not happen in the absence of IQGAP1. hnRNPM is sumoylated by  
85 SUMO2/3 in response to heat stress (Liebelt et al., 2019) and we show here that IQGAP1 regulates  
86 such sumoylation/desumoylation of hnRNPM. We finally assay the impact of the hnRNPM-IQGAP1  
87 RNPs in gastric cancer progression and we show that they support tumour promoting AS of cell cycle  
88 components, such as the substrate recognizing subunit of the anaphase promoting  
89 complex/cyclosome (APC/C), ANAPC10. In the absence of the hnRNPM-IQGAP1 RNPs, cell cycle  
90 progression and tumour growth are halted, making the two proteins and their interaction an interesting  
91 cancer drug target.

92

## 93 **RESULTS**

### 94 **IQGAP1 expression levels are significantly increased in gastric cancer cells**

95 Immunofluorescent analysis of the IQGAP1 protein levels on commercial gastric tissue microarrays  
96 revealed increased immunostaining in tumour as compared to normal tissue, especially in  
97 adenocarcinoma and signet-ring cell carcinoma samples (Figure 1A, B and Supplementary Figure  
98 S1A). This finding agrees with TCGA data analyses that indicate significantly increased expression of  
99 *IQGAP1* mRNA in stomach adenocarcinoma (STAD) and esophagogastric cancers (STES) vs normal  
100 tissue (Figure 1C). Interestingly, among cancer types where IQGAP1 expression is significantly  
101 increased relative to normal tissues, STES cancers show the highest frequency of alterations (mainly  
102 amplifications and mutations) in the *IQGAP1* locus (Supplementary Figure S1B). Furthermore, high  
103 IQGAP1 expression in STES and STAD tumours predicts low survival probability for patients  
104 (Supplementary Figure S1C-D).

105 Prompted by the tissue microarray results and the TCGA data, we assayed IQGAP1 protein levels in  
106 a number of gastric cancer cell lines by immunoblotting and identified cell lines with low (MKN45,  
107 AGS) or high (NUGC4, KATOIII) levels of IQGAP1 (Figure 1D). Two of those STAD cell lines with  
108 different IQGAP1 levels were used for further studies on the role of nuclear IQGAP1: NUGC4, a  
109 gastric signet-ring cell adenocarcinoma cell line, derived from paragastric lymph node metastasis and  
110 MKN45, a gastric adenocarcinoma cell line, derived from a liver metastatic site.

### 111 **Nuclear IQGAP1 is a component of RNPs involved in splicing regulation**

112 In agreement with previous reports that nuclear IQGAP1 can be detected in a small fraction of  
113 untreated cells (M. Johnson et al., 2011), we detected IQGAP1 in the nucleus of both STAD cell lines,  
114 the high IQGAP1, NUGC4 and the low IQGAP1, MKN45, using immunofluorescence and confocal  
115 imaging (Figure 2A). IQGAP1 was also detected in the nucleus of a fraction of cells in the cancer  
116 tissue samples of the microarray (Figure 1A).

117 To assess the role of the nuclear pool of IQGAP1 we identified its interacting partners by performing  
118 immunoprecipitation with anti-IQGAP1 Abs from nuclear extracts derived from the high-IQGAP1 cell  
119 line and analysed the co-immunoprecipitated proteins by LC-MS/MS (Supplementary Table S1). The  
120 nuclear extract preparations used in our immunoprecipitation assays are enriched for the majority of  
121 hnRNPs (Choi & Dreyfuss, 1984; P. Kafasla et al., 2000) (e.g. A2B1, K, M), other nuclear speckle  
122 components like SRSF1, and nuclear matrix associated proteins like SAFB and MATRIN3  
123 (Supplementary Figure S2A, B), but not histones such as H3, which are present mainly in the  
124 insoluble nuclear material (Supplementary Figure S2A).

125 GO-term enrichment analysis of the nuclear IQGAP1 co-precipitated proteins showed a significant  
126 enrichment in biological processes related to splicing regulation (Supplementary Figure S2C).  
127 Construction of an IQGAP1 interaction network revealed that IQGAP1 can not only interact with the  
128 majority of the hnRNPs, but also with a large number of spliceosome components (mainly of U2,  
129 U5snRNPs) and RNA-modifying enzymes (Figure 2B). The interactions between IQGAP1 and  
130 selected hnRNPs (A1, A2B1, C1C2, L, M) as well as with selected spliceosome components and  
131 RNA processing factors (SRSF1, CPSF6, DDX17, DHX9, ILF3/NF90) (Cvitkovic & Jurica, 2013) were  
132 further validated in both STAD cell lines that we used (Figure 2C, Supplementary Figure S2D). The  
133 interactions of IQGAP1 with hnRNPs A1, A2B1 are RNA-dependent. A subset of hnRNPs L and  
134 C1/C2 interact with IQGAP1 in the absence of RNA in both cell lines. The interaction between  
135 IQGAP1 and hnRNPM was singled out as the only RNA-independent one detected, particularly in the  
136 low-IQGAP1 cell line, MKN45 (Figure 2C). These data suggest a role for the nuclear pool of IQGAP1  
137 in splicing regulation.

138

### 139 **IQGAP1 participates in alternative splicing regulation in gastric cancer cell lines**

140 To further study the role of the nuclear pool of IQGAP1 in gastric cancer cells we knocked-out (KO)  
141 successfully *IQGAP1* in both STAD cell lines (the low- and high-IQGAP1 ones) using a CRISPR-Cas9  
142 approach, without affecting significantly hnRNPM protein levels (Supplementary Figure S3A).

143 We assessed the functional involvement of IQGAP1 in splicing by using the three exon minigene  
144 splicing reporters DUP51M1 and DUP50M1. In splicing assays, hnRNPM binds on exon 2 of the  
145 respective pre-mRNAs and prevents its inclusion (Damianov et al., 2016). Transfection of the two  
146 parental STAD cell lines and the derived KO ones with the reporter plasmid and subsequent RT-PCR  
147 analysis with primers that allow detection of the two possible mRNA products revealed different  
148 splicing patterns of the reporter: the high IQGAP1 cells (NUGC4) showed increased inclusion of exon

149 2 compared to the low IQGAP1 ones (MKN45) (Figure 3A). Interestingly, downregulation of *IQGAP1*  
150 resulted in further increase of exon 2 inclusion in both KO cell lines, compared to the parental cells  
151 (Figure 3A). This change was more apparent in the low IQGAP1 cell line (~2-fold increase of exon 2  
152 inclusion in MKN45-*IQGAP1*<sup>KO</sup> cells compared to the parental ones) (Figure 3A). Attempts to restore  
153 the AS pattern of the reporter by expressing GFP-IQGAP1 were inconclusive, as expression of the  
154 recombinant protein inhibited rather than rescued exon 2 skipping (Supplementary Figure S3B),  
155 probably because GFP-IQGAP1 localized very efficiently in the nucleus [(M. Johnson et al., 2011) and  
156 Supplementary Figure S3B] and thus sequestered splicing factors from the splicing machinery.

157 To gain further insight on the importance of IQGAP1 in AS regulation in gastric cancer cells, we  
158 profiled AS pattern changes between the low-IQGAP1 cell line which is more responsive to IQGAP1  
159 depletion (MKN45) and the respective *IQGAP1*<sup>KO</sup> cells by RNA-seq. A number of significantly altered  
160 AS events were detected (Figure 3B, C and Supplementary Table S2A) more than 50% of which were  
161 alternative exons (Figure 3B), with similar distribution of  $\Delta\Psi$  values for the downregulated and  
162 upregulated events (where [Psi] is the Percent Spliced In, i.e. the ratio between reads including or  
163 excluding alternative exons) (Figure 3C).

164 GO-term enrichment analysis of the affected genes yielded significant enrichment of the biological  
165 processes of cell cycle (GO:0007049, P: 3.75E-04) and cell division (GO:0051301, P: 3.33E-04)  
166 (Figure 3D and Supplementary Table S2B). Similarly, GO term enrichment analysis of the group of  
167 genes that were differentially expressed upon *IQGAP1*<sup>KO</sup> revealed significant enrichment of cell cycle  
168 related biological processes (Figure S3C-D and Supplementary Table S2C). However, only 5 genes  
169 were differentially expressed and at the same time were among the altered AS events  
170 (Supplementary Table S2D), indicating that IQGAP1's regulation of cell cycle at the level of AS is  
171 distinct from that at the levels of transcription or mRNA stability (Popp & Maquat, 2013; Sharma et al.,  
172 2011).

173 To focus on the role of IQGAP1 in AS we validated selected events by RT-PCR analyses (Figure 3E-  
174 F, and S3E). Events selected for validation were required to adhere to the following criteria: 1) high  
175 difference in Psi ( $\Delta\Psi$ ) between the KO and the parental cell lines, 2) involvement of the respective  
176 proteins in the cell cycle, 3) characterization of the event as SOK (Super okay), or OK (okay) based  
177 on the quality scores acquired during the analysis (Irimia et al., 2014). 12 out of 19 AS events (63%)  
178 selected based on the above criteria were validated (Figure 3E-F, Supplementary S3E,  
179 Supplementary Table S3).

180 Upon validation, we searched the sequences surrounding the alternative exons for enrichment of  
181 binding motifs of splicing factors that interact with IQGAP1 (Figure 2). Such analyses revealed a  
182 significant enrichment of hnRNPM binding motifs downstream of 25% of the downregulated exons  
183 (Figure 3G). Enrichment of the binding motifs of other splicing factors interacting with IQGAP1 was  
184 observed in smaller percentages of the downregulated exons (Supplementary Figure S4 for the motifs  
185 of highest enrichment). Such a high enrichment of a binding motif in the up-regulated exons was not  
186 detected.

187 Taken together these results show that IQGAP1 is involved in AS regulation. Its RNA-independent  
188 interaction with hnRNPM stands out as a distinct one, as the two proteins are predicted to regulate  
189 common AS events related to cell cycle and cell division.

190

191 **IQGAP1 interacts with hnRNPM in the nucleus of gastric cancer cells to control its regulatory**  
192 **role in splicing**

193 The interaction of nuclear IQGAP1 with hnRNPM was confirmed *in situ* using the proximity ligation  
194 assay (PLA) (Figure 4A). The  $\beta$ -actin-IQGAP1 interaction (M. A. Johnson et al., 2013) was assayed  
195 by PLA as a positive control (Supplementary Figure S5A). Quantification of the cytoplasmic and  
196 nuclear PLA signal generated by the interaction between hnRNPM and IQGAP1 per cell  
197 demonstrated that the interaction takes mainly place in the nucleus of gastric cancer cell lines (Figure  
198 4B). Some cytoplasmic interaction sites were also detected, but they were minor compared to the  
199 nuclear ones (Figure 4A, B). In agreement with these results, immunoprecipitation from cytoplasmic  
200 extracts using anti-IQGAP1 antibodies did not reveal an interaction with the minor amounts of  
201 cytoplasmic hnRNPM (Supplementary Figure S5B), indicating that if the proteins do interact in the  
202 cytoplasm, these complexes are less abundant compared to the nuclear ones. The IQGAP1-hnRNPM  
203 interaction appears to be DNA-independent as it is still detected after immunoprecipitation in the  
204 presence of DNase (Supplementary Figure S5C).

205 To assess the functional involvement of IQGAP1 in hnRNPM-regulated splicing, we transfected the  
206 *IQGAP1*<sup>KO</sup> and the parental STAD cell line with the hnRNPM-responsive DUP51M1 and the hnRNPM-  
207 non-responsive DUP51- $\Delta$ M plasmids and performed RT-PCR analysis as described above. DUP51-  
208  $\Delta$ M is a mini-gene reporter derived from DUP51M1 by mutating the hnRNPM binding site in exon 2 (a  
209 unique UGGUGGUG hnRNPM consensus binding motif). This results in increased inclusion of exon 2  
210 in comparison to the DUP51M1 reporter, due to loss of hnRNPM binding (Damianov et al., 2016)  
211 (compare lanes 1, 2 of Figure 4C and quantification of more experiments presented in Figure 4D).  
212 Though the splicing pattern of both reporters was affected upon IQGAP1 loss, the effect of IQGAP1  
213 deletion on the AS of the hnRNPM-responsive reporter, DUP51M1 (compare lanes 1, 3 of Figure 4C  
214 and Figure 4D) was more prominent compared to the effect on the AS of the hnRNPM non-  
215 responsive reporter, DUP51- $\Delta$ M (compare lanes 2, 4 of Figure 4C and Figure 4D). Thus, even though  
216 IQGAP1 seems to participate in hnRNPM-independent AS regulation, which is not surprising since it  
217 interacts with a large number of splicing factors in nuclear RNPs (Figure 2), the effect of IQGAP1  
218 deletion on hnRNPM-dependent AS regulation is more significant. IQGAP1 deletion affects hnRNPM-  
219 dependent AS regulation to levels similar to the ones imposed by the loss of hnRNPM binding to the  
220 pre-mRNA (compare lanes 2, 3 in Figure 4C and Figure 4D). These results on the effect of IQGAP1  
221 on AS *in vitro* were reproduced when we used the minigene reporter DUP50M1 (Supplementary  
222 Figure S5D) which was derived from DUP51M1 and has a slightly altered hnRNPM binding site on  
223 exon 2 (Damianov et al., 2016). Thus, IQGAP1 participates in AS regulation, having a greater effect  
224 on the outcome when hnRNPM can bind and regulate the AS of the pre-mRNA.

225 To investigate whether it is the binding of hnRNPM on its pre-mRNA target that is affected by the  
226 absence of IQGAP1, we used the DUP51M1 minigene reporter and tested the association of  
227 hnRNPM with the DUP51M1 transcript using UV-crosslinking, immunoprecipitation with anti-hnRNPM  
228 antibodies, and RT-PCR of the associated pre-mRNA. After quantitation and normalization to a non-  
229 specific IP control and to GAPDH mRNA (Figure 4E), no significant differences were detected  
230 between the parental and the IQGAP1<sup>KO</sup> cells in the amount of RNA that was crosslinked to hnRNPM,  
231 indicating that IQGAP1 does not regulate the binding of hnRNPM to its RNA targets.

232 To further explore the role of the nuclear interaction between IQGAP1 and hnRNPM, we assessed  
233 whether IQGAP1 is enriched in the Large Assembly of Spliceosome Regulators (LASR), of which  
234 hnRNPM has been identified as a significant component. This complex is assembled via protein-  
235 protein interactions, lacks DNA/RNA components, and appears to function in co-transcriptional AS  
236 regulation (Damianov et al., 2016). In gastric cancer cells, IQGAP1 and hnRNPM co-exist mainly in  
237 the soluble nuclear fraction together with hnRNPs K, C1/C2 and other spliceosome components  
238 (Damianov et al., 2016). Significantly smaller IQGAP1 and hnRNPM amounts were detected in the  
239 proteins released from the high molecular weight (HMW) material upon DNase treatment (D), together  
240 with hnRNP C1/C2 and other spliceosome components, including SF3B3 (Supplementary Figure S5E).  
241 This result conclusively suggests that the interacting pools of IQGAP1 and hnRNPM are not major  
242 LASR components and as such their interaction does not necessarily participate in co-transcriptional  
243 splicing events (Damianov et al., 2016).

244 Taken together, these results suggest that IQGAP1 participates in AS function of different splicing  
245 factors, with a strong involvement in hnRNPM's splicing activity, without affecting its binding to its pre-  
246 mRNA target.

247

#### 248 **IQGAP1 regulates hnRNPM's splicing activity by controlling its subnuclear distribution in** 249 **cancer cells**

250 It is known that AS outcome can be determined by changes in the subnuclear/subcellular distribution  
251 of certain splicing factors (Heyd & Lynch, 2011; van der Houven van Oordt et al., 2000; Zhong et al.,  
252 2009). Specifically for hnRNPM, two cases of changes in its subnuclear distribution have been  
253 described that result in altered splicing outcome: The first involves hnRNPM's response to heat-shock  
254 whereby the protein changes its localization from the nucleoplasm towards the insoluble nuclear  
255 matrix (Gattoni et al., 1996). The other is its response to a chemotherapeutic inhibitor (BEZ235) of the  
256 PI3K/mTOR pathway (Passacantilli et al., 2017). To evaluate the possibility that IQGAP1 affects  
257 hnRNPM-regulated AS outcome by interfering with its localization we compared the subcellular  
258 distribution of hnRNPM between parental and IQGAP1<sup>KO</sup> cells (Figure 5A, B and Supplementary S6A)  
259 using immunofluorescence and confocal microscopy. A subtle but noticeable and quantifiable change  
260 in the subnuclear distribution of hnRNPM was detected upon IQGAP1 depletion, with the perinuclear  
261 enriched localization in parental cells changing to a more diffused distribution, not only at the

262 periphery of the nuclei, but also deeper within the nuclei (Figure 5A-C and Supplementary Figure  
263 S6A).

264 To detect whether in the absence of IQGAP1, hnRNPM can be further displaced by heat- or BEZ235  
265 treatment, we assayed MKN45 cells and the *IQGAP1*<sup>KO</sup> derivatives for localization of hnRNPM under  
266 these two treatment conditions (Supplementary Figure S6). The localization of hnRNPM changed  
267 upon heat-shock from its mostly perinuclear pattern in untreated parental cells to a more diffused one,  
268 less localized at the periphery, in the heat-shocked cells (Figures 5C upper panels and  
269 Supplementary S6A-B). Surprisingly, hnRNPM's localization and staining pattern did not change upon  
270 heat-shock in cells lacking IQGAP1 (Figure 5A lower panels and Supplementary S6A-B), showing the  
271 necessity of IQGAP1 for the response of hnRNPM to heat-induced stress. Though we could clearly  
272 detect the effect of BEZ235 treatment on the subnuclear distribution of hnRNPM in the low-IQGAP1  
273 cell line, the results we got for *IQGAP1*<sup>KO</sup> cells were not as clear and quantifiable as those with heat-  
274 shock (Supplementary Figure S6C). Therefore, we firstly used heat-shock to further characterise the  
275 involvement of IQGAP1 in hnRNPM's splicing activity through changes of its subnuclear distribution.

276 To mechanistically probe how the localization of hnRNPM impacts on AS outcome, we compared  
277 hnRNPM's subnuclear localization to that of splicing regulators like the SR proteins (SRp75, SRp55,  
278 SRp40, SRp30a/b and SRp20), which have a role in constitutive and alternative splicing regulation in  
279 untreated and heat-shocked parental and *IQGAP1*<sup>KO</sup> cells (Figure 5C, D). Upon heat-shock,  
280 colocalization between hnRNPM and SR proteins was reduced in parental cells. hnRNPM and SR  
281 proteins showed also decreased colocalization in untreated cells lacking IQGAP1, and no further  
282 change was induced upon heat-shock (Figure 5C, D). Furthermore, the localization of the signal  
283 generated by the anti-SR antibody changed upon heat shock, showing that at least some of the  
284 detected SR factors respond to heat-induced stress by altering subnuclear distribution, however,  
285 these changes happen only in the presence of IQGAP1 (Figure 5C, D).

286 These observations prompted us to test whether the involvement of IQGAP1 in the heat-induced  
287 subnuclear relocalization of AS regulators is linked to their splicing activity. For this, we tested the  
288 alternative splicing pattern of the hnRNPM-responsive DUP50M1 minigene reporter upon heat-shock  
289 in *IQGAP1*<sup>KO</sup> and parental cells. In agreement with our observations (Figure 5A-D) and previous  
290 reports on the impact of heat-shock on the splicing machinery (Denegri et al., 2001; Mähl et al., 1989;  
291 Shalgi et al., 2014), this stress exposure resulted in change of the ratio of the AS products of the  
292 reporter in our *in vitro* assay (Figure 5E, lanes 1-2). However, this effect was not apparent when  
293 IQGAP1 was depleted from the cells (Figure 5E, lanes 3-4). No effect of heat-shock was observed on  
294 the AS pattern of the hnRNPM non-responsive reporter (DUP50- $\Delta$ M) under these conditions (Figure  
295 5F, lanes 1-4) independently of the presence of IQGAP1. Taken together these results show not only  
296 that IQGAP1 is required for the response of hnRNPM to heat-shock, but also through its effect on  
297 hnRNPM it mediates the response of the splicing machinery to heat-induced stress.

298



299 **IQGAP1 is necessary for changes in the sumoylation status of hnRNPM and regulates its**  
300 **exchange between the nuclear matrix and the splicing machinery**

301 To gain further mechanistic insight into how IQGAP1 mediates the response of hnRNPM and the  
302 splicing machinery to heat-shock, and guided by previous results showing that in heat-shocked cells  
303 hnRNPM moves away from spliceosomal components towards the nuclear matrix (Gattoni et al.,  
304 1996), we compared nuclear matrix preparations from parental and *IQGAP1*<sup>KO</sup> cells before and after  
305 heat-shock. Elevated hnRNPM levels were detected in the nuclear matrix of the parental cells after  
306 heat-shock compared to untreated cells, whereas this change was not detected in the *IQGAP1*<sup>KO</sup> cells  
307 (Figure 6A). Critically, IQGAP1 levels were also increased in nuclear matrix fractions prepared from  
308 heat-shocked cells (Figure 6A). In agreement with this, increased nuclear IQGAP1 staining was  
309 detected in heat-shocked cells, compared to the untreated controls (Supplementary Figure S7A).

310 Using confocal microscopy and immunofluorescence staining, we compared the localization of  
311 hnRNPM with PSF (SFPQ) which is enriched in the nuclear matrix, and interacts with splicing  
312 regulators in the soluble nucleoplasm (e.g. PTB) (Meissner et al., 2000). Marko and colleagues  
313 (Marko et al., 2010) have shown that PSF interacts with hnRNPM and colocalizes with it in nuclear  
314 matrix preparations. The colocalization of hnRNPM and PSF was partial in untreated parental cells,  
315 and was significantly increased upon heat shock (Figure 6B, C) confirming that upon heat-shock  
316 hnRNPM moves closer to PSF, possibly in the nuclear matrix. In untreated cells lacking IQGAP1,  
317 there was a higher percentage of colocalization between hnRNPM and PSF compared to parental  
318 cells, and no further change was observed upon heat shock (Figure 6B, C).

319 HnRNPM is sumoylated by SUMO2/3 in early spliceosome complexes (Pozzi et al., 2017) and in  
320 response to heat-stress (Liebelt et al., 2019) when its association with the spliceosome is abolished  
321 (Gattoni et al., 1996; Llères et al., 2010) affecting mainly post-transcriptional splicing events (Shalgi et  
322 al., 2014). To explore whether IQGAP1 regulates hnRNPM's subnuclear distribution and function via  
323 its sumoylation status, we used anti-hnRNPM Abs to pull-down hnRNPM from *IQGAP1*<sup>KO</sup> and  
324 parental cells before and after heat-shock. Analysis of the pulled down material by immunoblot with  
325 anti-hnRNPM antibodies showed that in addition to the bands of hnRNPM at ~70kDa, we could detect  
326 proteins of higher molecular weight (differing ~20 and up to 100 kDa from hnRNPM, a shift consistent  
327 with hnRNPM being modified by SUMO at a single or more lysine residues) that were enriched in the  
328 *IQGAP1*<sup>KO</sup> (untreated and heat-shocked) and in the parental heat-shocked cells, compared to the  
329 untreated cells (Supplementary Figure S7B). We confirmed that these higher molecular weight  
330 species corresponded to SUMO-conjugates by immunoblotting of the anti-hnRNPM precipitated  
331 proteins with anti-SUMO2/3 antibodies (Figure 6D). Increased amounts and number of sumoylated  
332 hnRNPM species were pulled down by the anti-hnRNPM Ab from nuclear extracts derived from heat-  
333 shocked MKN45 cells compared to the untreated controls. Similarly, increased amount and number of  
334 SUMO conjugates were pulled down by the anti-hnRNPM Abs from extracts derived from MKN45-  
335 *IQGAP1*<sup>KO</sup> cells (both untreated and heat-shocked), compared to untreated parental cells (Figure 6D).  
336 To further support this finding, we detected sumoylated hnRNPM and compared its levels in parental  
337 and *IQGAP1*<sup>KO</sup> cells by the proximity ligation assay using anti-hnRNPM and anti-SUMO2/3 antibodies

338 (Matic et al., 2010) (Figure 6E and Supplementary Figure S7C). The levels of sumoylated hnRNPM  
339 were indeed significantly increased in untreated *IQGAP1<sup>KO</sup>* cells compared to the parental cells  
340 (Figure 6E and Supplementary Figure S7C). Smaller differences were detected in sumoylated-  
341 hnRNPM levels between the heat-shocked cells (both parental and *IQGAP1<sup>KO</sup>*) and untreated  
342 *IQGAP1<sup>KO</sup>* cells (Figure 6E and Supplementary Figure S7C). The localization of sumoylated hnRNPM  
343 was nuclear, as expected and its subnuclear distribution agreed well with the subnuclear distribution  
344 described in Figures 5A and 6C (Supplementary Figure S7C).

345 Taken together, these results show that IQGAP1 regulates the AS-activity of hnRNPM and its proper  
346 localization in the nucleus. In the absence of IQGAP1, hnRNPM is sumoylated by SUMO2/3, moves  
347 further away from spliceosomal components of the SR protein family and closer to the nuclear matrix.  
348 This effect is replicated when IQGAP1 is present and the cells are exposed to heat-shock. In the  
349 absence of IQGAP1, hnRNPM is already in a “heat-shock” state and does not further respond to this  
350 stress signal.

351

### 352 **IQGAP1 and hnRNPM co-regulate the function of APC/C through AS of the ANAPC10 pre-** 353 **mRNA and promote gastric cancer cell growth *in vitro* and *in vivo***

354 Given the role of IQGAP1 as a regulator of hnRNPM's activity in splicing in gastric cancer cells and  
355 the significance of hnRNPM for the survival of STAD patients (Supplementary Figure S8A) we  
356 assessed how the AS events that are regulated by both IQGAP1 and hnRNPM contribute to STAD  
357 development and progression. From the AS events detected in our genome wide analyses (Figure 3)  
358 *ANAPC10* pre-mRNA was singled out for further study as it had the highest change in  $|\Delta\Psi|/\Psi$   
359 combination (Figure 7A, Supplementary Table S2a). The *ANAPC10* pre-mRNA is an hnRNPM-eCLIP  
360 target (Van Nostrand et al., 2016) with the major hnRNPM binding site downstream of the regulated  
361 exon, where the predicted hnRNPM consensus binding motif is also located (Supplementary Figure  
362 S8B). Moreover, based on TCGA data analyses, downregulation of this event is connected to better  
363 survival of STAD patients (Supplementary Figure S8C). ANAPC10 plays a critical role in cell cycle  
364 and cell division as a substrate recognition component of the APC/C which is a cell cycle-regulated  
365 E3-ubiquitin ligase that controls progression through mitosis and the G1 phase of the cell cycle.  
366 ANAPC10 interacts with the co-factors CDC20 and/or CDH1 to recognize targets to be ubiquitinated  
367 and subsequently degraded by the proteasome (da Fonseca et al., 2011; Yamano, 2019; Zhuan Zhou  
368 et al., 2016).

369 In *IQGAP1<sup>KO</sup>* cells, decreased levels of *ANAPC10* exon 4 inclusion were detected (Figure 7B). Using  
370 siRNAs against hnRNPM in *IQGAP1<sup>KO</sup>* cells we detected that simultaneous downregulation of the  
371 levels of both IQGAP1 and hnRNPM proteins led to further decrease in *ANAPC10* exon 4 inclusion  
372 (Figure 7B). Skipping of exon 4 results in the preferential production of an isoform lacking amino acid  
373 residues important for interaction with the D-box of the APC/C targets (Alfieri et al., 2017; Engström et  
374 al., 1985). To verify that this is the case, using LC-MS/MS analyses of the proteomes of the parental

375 and the *IQGAP1*<sup>KO</sup> cell lines, we compared the levels of known targets of the APC/C complex (Figure  
376 7C). We detected increased abundance of anaphase-specific targets of the APC/C-CDH1 (Zhuan  
377 Zhou et al., 2016), namely RRM2, TPX2, ANLN, and TK1, but not of other APC/C known targets  
378 (Figure 7C). Immunoblotting verified that TPX2, RRM2 and TK1 levels were increased in *IQGAP1*<sup>KO</sup>  
379 cells and even more after concomitant siRNA mediated *hnRNPM* knock-down (Supplementary Figure  
380 S8D). The same was true for CDH1/FZR, an APC/C co-factor, which is also a target of the complex,  
381 as is ANLN (Figure S8E). Interestingly, survival plots for RRM2 and TK1 show that increase in  
382 expression levels of the respective mRNAs results in better prognosis for survival for STAD patients  
383 (Supplementary Figure S8F, G).

384 To assess the effect of such a phenotype in gastric cancer cell growth, we used a CRISPR-Cas9  
385 approach to generate *hnRNPM*<sup>KO</sup> and double KO cells. However, numerous attempts to disrupt the  
386 ORF of *hnRNPM* resulted in only ~75% reduction, as we could not isolate single *hnRNPM*<sup>KO</sup> clones in  
387 any gastric cancer cell line. Thus, for the subsequent experiments we worked with mixed cell  
388 populations with 75% reduced *hnRNPM* expression levels or we used siRNAs for downregulation of  
389 *hnRNPM* where stated (Supplementary Figure S9A).

390 Since the RNA-seq analyses revealed that the *IQGAP1*-regulated AS events are cell cycle-related, we  
391 first performed cell cycle analyses using propidium iodide combined with flow cytometry.  
392 Unsynchronized *IQGAP1*<sup>KO</sup> cells had a small but significant increase in cell populations at the S and  
393 G2/M phases with subsequent reduction of cells at the G1 phase (Figure 7D). *hnRNPM*<sup>KO</sup> cells  
394 showed a similar phenotype, whereas depletion of both interacting proteins (*hnRNPM*<sup>KO</sup>-*IQGAP1*<sup>KO</sup>)  
395 enhanced this effect (Figure 7D). These differences were more pronounced after cell cycle  
396 synchronization (Supplementary Figure S9B).

397 To further delineate this phenotype and given the role of APC/C and its targets, TK1, RRM2 and  
398 TPX2 in the progression of mitosis and cell division (Engström et al., 1985; Neumayer et al., 2014;  
399 Sherley & Kelly, 1988; Zhuan Zhou et al., 2016) we assayed the impact of the downregulation of both  
400 *IQGAP1* and *hnRNPM* on cell division. Using DAPI staining and anti- $\beta$ -tubulin cytoskeleton  
401 immunostaining we detected a significant number of double *IQGAP1*<sup>KO</sup>-*hnRNPM*<sup>KO</sup> cells being  
402 multinucleated (2 or more nuclei; Supplementary Figure S9C for an example and Figure 7E for  
403 quantitation). A similar phenotype was detected when siRNAs were used to downregulate *hnRNPM*  
404 levels (data not shown).

405 By assaying the parental and the derivative double *IQGAP1*<sup>KO</sup> - *hnRNPM*<sup>KO</sup> cells for their ability to  
406 form colonies in a 2D colony formation assay, we observed that cells with reduced levels of both  
407 *IQGAP1* and *hnRNPM* proteins generated a significantly reduced number of colonies compared to  
408 parental cells (Supplementary Figure S9D). Wound healing assays did not reveal significant  
409 differences in the migratory ability of these cell lines, only an increase in wound healing rate for  
410 *hnRNPM*<sup>KO</sup> cells compared to the parental cells. Importantly, this expedited wound healing in  
411 *hnRNPM*<sup>KO</sup> cells was completely abolished upon concomitant absence of *IQGAP1* (Supplementary  
412 Figure S9E).

413 To examine the *in vivo* effect of the absence of IQGAP1 and hnRNPM on tumour development and  
414 progression, we injected the MKN45-derived cell lines (MKN45, MKN45-*IQGAP1*<sup>KO</sup>, MKN45-  
415 *hnRNPM*<sup>KO</sup> and MKN45-*hnRNPM*<sup>KO</sup>-*IQGAP1*<sup>KO</sup>) subcutaneously into the flanks of NOD/SCID mice.  
416 Tumor development in this non-metastatic animal model was followed by measurements of tumour  
417 dimensions throughout the experiment. Cells with reduced levels of both IQGAP1 and hnRNPM  
418 resulted in significantly reduced tumour growth compared to the parental and the single KO cells  
419 (Figure 7F). Immunohistochemical analysis of the tumours confirmed greatly reduced levels of  
420 hnRNPM and/or IQGAP1 in the cell lines-derived xenografts. Furthermore, Ki-67 staining was  
421 significantly reduced in the single and double KO tumours compared to the parental cell line-derived  
422 ones, showing the involvement of the two proteins in the *in vivo* proliferation of gastric cancer cells  
423 (Supplementary Figure S9F).

424 Collectively, these results demonstrate that IQGAP1 and hnRNPM co-operatively generate at least an  
425 alternatively spliced isoform of ANAPC10. This, in turn, tags cell cycle-promoting proteins for  
426 degradation and contributes to the accelerated proliferation phenotype of tumour cells. In this aspect,  
427 a form of synergy of IQGAP1 with hnRNPM is required for gastric cancer cell growth and progression  
428 both *in vitro* and *in vivo*.

429

## 430 **DISCUSSION**

431 Splicing regulatory networks are subject to signals that modulate alternative exon choice. These  
432 signals alter not only the expression levels of splicing regulators but also the post-translational  
433 modification levels of these splicing regulators or their subcellular distribution. Information however,  
434 on how signals reach and alter the outcome of AS events is still missing.

435 One of the best characterized AS changes in response to stress signals is the shutdown of post-  
436 transcriptional pre-mRNA splicing that is observed in heat-shocked cells (Biamonti & Caceres, 2009;  
437 Shalgi et al., 2014). However, it is still unknown how this mechanistically occurs and how the heat-  
438 induced signals reach their targets and affect the AS regulatory components of the spliceosome. Here,  
439 we provide conclusive evidence for the role of a scaffold protein, IQGAP1, in mediating the response  
440 of AS regulators to heat-induced stress.

441 We show that nuclear IQGAP1 interacts with a large number of splicing factors mostly in an RNA-  
442 dependent manner, and is necessary for the response of components of the splicing machinery such  
443 as SR proteins to heat-induced stress signals. Focusing on the RNA-independent interaction of  
444 IQGAP1 with hnRNPM, we show that only in the presence of IQGAP1, hnRNPM responds to heat-  
445 induced stress by acquiring a differential sumoylation status and by moving away from spliceosome  
446 components towards the less-well-defined nuclear matrix. Because, based on the results presented  
447 herein and on published data (Gattoni et al., 1996; Mähl et al., 1989), hnRNPM is a splicing factor  
448 critical for the response of the spliceosome to heat-shock, the effect of IQGAP1 on hnRNPM's

449 participation in AS events can be deterministic for the response of the splicing machinery to heat-  
450 induced stress.

451 Furthermore, the absence of IQGAP1 alone triggers the same effect on hnRNPM as heat-shock. In  
452 *IQGAP1<sup>KO</sup>* cells, hnRNPM is already in a “splicing-inactive” sumoylation state, close to nuclear matrix  
453 components as it is in heat-shocked cells. In this state, hnRNPM is unable to properly regulate  
454 splicing *in vitro* even though it can still bind its pre-mRNA target. Therefore, IQGAP1 is necessary for  
455 efficient splicing activity of hnRNPM by controlling the proper localization of hnRNPM as well as  
456 hnRNPM's sumoylation/desumoylation cycles. The fact that IQGAP1 is a scaffold protein with well-  
457 known roles in the cytoplasm as an integrator of many signalling cascades suggests that the  
458 involvement of IQGAP1 in the response of AS to stress signals may be a generalized phenomenon.

459 The nuclear translocation and localization of IQGAP1 appears to be cell-cycle dependent, since it is  
460 significantly increased in response to replication stress and subsequent G1/S arrest (M. Johnson et  
461 al., 2011). This finding complements prior reports which showed that IQGAP1 localizes at the nuclear  
462 envelope during late mitotic stages (Lian et al., 2015). Furthermore, Cyclebase data (Santos et al.,  
463 2015) suggest that hnRNPM is required for progression of the cell cycle G1 phase. We show that in  
464 the absence of IQGAP1, a number of pre-mRNAs involved in cell cycle regulation undergo differential  
465 AS. We posit that both IQGAP1 and hnRNPM regulate the AS of a cell-cycle RNA regulon because 5  
466 out of the 10-cell division-related AS events, that are deregulated in the absence of IQGAP1, are exon  
467 skipping events that bear an hnRNPM binding motif downstream of the alternative exon. We singled  
468 out *ANAPC10* out of these events because it plays a significant role in cell cycle regulation and cell  
469 division (Yamano, 2019; Zhuan Zhou et al., 2016) and has the highest change in AS pattern upon  
470 IQGAP1 knock out. Indeed, in cells with reduced amounts of both IQGAP1 and hnRNPM, *ANAPC10*  
471 AS is further altered and at least a group of APC/C-CDH1 targets are specifically stabilized (TPX2,  
472 RRM2, TK1, CDH1 itself). Given the central role played by the controlled degradation of these  
473 proteins for cell cycle progression (Penas et al., 2011; Zhuan Zhou et al., 2016), we posit that these  
474 observations can explain the aberrant cell cycle effect in the double KO cell lines and the  
475 multinucleated cells phenotype we observed. These findings can also explain the importance of the  
476 two proteins for gastric cancer development and progression as detected by our xenograft  
477 experiments.

478 Currently, the literature on signal regulated AS, cell cycle control and tumour growth is rather  
479 fragmentary. Evidence that connect cell cycle progression to signalling pathways come mainly from  
480 reports on transcriptional control (Benary et al., 2020; Rhind & Russell, 2012) and on tumour growth  
481 (Gijn et al., 2019; Levine & Holland, 2018; Penas et al., 2011; Sansregret et al., 2017). On the other  
482 hand, AS is subject to extensive periodic regulation during the cell cycle and at the same time it is  
483 highly controlled during distinct phases of the cell cycle (Dominguez et al., 2016). Our results identify  
484 at least one missing link between extra-nuclear signals and alternative splicing. Emphasizing on  
485 tumour growth we show that this same link, IQGAP1, which is able to respond to cell cycle  
486 progression connects AS to cell cycle and drives the balance towards tumour growth-promoting  
487 splicing. Looking at the bigger picture, it will be interesting to test this regulation in the case of normal

488 cells and assess the possibility that the interaction of IQGAP1 with splicing regulators e.g. hnRNPM  
489 could be targeted for development of very specific therapeutic approaches.

490

## 491 **MATERIAL AND METHODS**

### 492 **Reagents**

493 Unless stated otherwise, all chemicals were purchased from Sigma-Aldrich or ThermoFisher Scientific.  
494 DAB substrate kit was purchased from Vector Laboratories (Cat#SK-4100). hnRNPM-, IQGAP1- and  
495 control siRNAs were purchased from Santa-Cruz Biotechnology (Cat#sc-38286, sc-35700 and sc-  
496 37007 respectively). ProtoScript® II Reverse Transcriptase and DNase I (RNase-free) were  
497 purchased from New England Biolabs (Cat#M0368S and M0303S, respectively). RQ1 RNase-free  
498 DNase was purchased from Promega (Cat#M6101). Protein A/G Plus Agarose Beads were  
499 purchased from Santa-Cruz Biotechnology (sc-2003) The following antibodies were used: anti-  
500 hnRNPM, clone 1D8 (Santa Cruz Biotechnology, Cat# sc-20002; or NB200-314SS, Novus); anti-  
501 IQGAP1 (clone H109 Santa Cruz Biotechnology, Cat# sc-10792; RRID:AB\_2249072; clone D-3,  
502 Santa Cruz, Cat# sc-374307; clone C-9, Santa Cruz, Cat# sc-379021; Proteintech, Cat# 22167-1-AP);  
503 anti-Beta-actin (clone 7D2C10, ProteinTech, Cat# 60008-1-Ig); anti-Lamin B1 (clone A-11, Santa  
504 Cruz Cat#sc-377000); anti-GAPDH (ProteinTech, Cat#60004-1-Ig); anti-hnRNP A2/B1 (clone DP3B3,  
505 Santa Cruz Cat#sc-32316); anti-hnRNP A1 (clone 4B10, Santa-Cruz Biotechnology, Cat# sc-32301);  
506 anti-hnRNPL (clone 4D11, Santa-Cruz Biotechnology Cat# sc-46673); anti-hnRNP C1/C2 (clone 4F4,  
507 Santa-Cruz Biotechnology, Cat#sc-32308); anti-RNA Helicase A (Abcam Cat# ab26271); anti-hnRNP  
508 K/J (clone 3C2, Santa-Cruz Biotechnology Cat# sc-32307); anti-SF3B3 (clone B-4, Santa Cruz, Cat#  
509 sc-398670); anti-beta tubulin (clone 2-28-33, Sigma-Aldrich, Cat# T5293); anti-TPX2 (clone E-2,  
510 Santa-Cruz Biotechnology, Cat# sc-271570); anti-RRM2 (clone A-15, Santa-Cruz Biotechnology,  
511 Cat# sc-398294); anti-SAFB (F-3, Santa Cruz, Cat# sc-393403); anti- Matrin3 (Santa-Cruz  
512 Biotechnology, Cat#2539a); anti-Histone H3 (ProteinTech, Cat#17168-1-AP); anti-CPSF6 (clone H-59,  
513 Santa-Cruz Biotechnology, Cat#sc-292170); anti-NF90 (clone A-3, Santa-Cruz Biotechnology,  
514 Cat#sc-377406); anti-Anillin (CL0303, Abcam, Cat# ab211872); anti-FZR, (clone DSC-266, Santa-  
515 Cruz Biotechnology, Cat# sc-56312); anti-TK1 (EPR3193, Abcam, Cat# ab76495); anti-ANAPC10  
516 (clone B-1, Santa-Cruz Biotechnology, Cat# sc-166790); anti Ki67 (clone SolA15, ThermoFisher, Cat#  
517 14-5698-82); HRP-conjugated goat anti-rabbit (SouthernBiotech, Cat# 4050-05); HRP-conjugated  
518 goat anti-mouse IgG (SouthernBiotech, Cat# 1030-05); Anti-rabbit-Alexa Fluor 555 (Molecular  
519 Probes, Cat# A27039); Anti-mouse Alexa Fluor 488 (Molecular Probes Cat# A28175); Anti-mouse  
520 Alexa Fluor 647 (Invitrogen, Cat#A21235).

### 521 ***In Vivo* Animal Studies**

522 All animal experiments were performed in the animal facilities of Biomedical Sciences Research  
523 Center (BSRC) “Alexander Fleming” and were approved by the Institutional Committee of Protocol  
524 Evaluation in conjunction with the Veterinary Service Management of the Hellenic Republic Prefecture

525 of Attika according to all current European and national legislation and performed in accordance with  
526 the guidance of the Institutional Animal Care and Use Committee of BSRC “Alexander Fleming”. Mice  
527 were housed in an area free of pathogens as defined by FELASA recommendations in IVC cages at 5  
528 per cage at constant temperature (19-23°C) and humidity (55% ± 10%), with a 12-hour light/dark cycle  
529 (lights on at 7:00 am) and were allowed access to food and water ad libitum. Mice were allowed to  
530 acclimatize for at least 7 days prior to the experiment and were randomly assigned to experimental  
531 groups. Both male and female mice were used, roughly matched between CTR and KO groups. Mice  
532 had not been involved in any previous procedures.

### 533 **Mouse Xenograft studies**

534 1 x10<sup>6</sup> cells in 100µl of PBS:Matrigel (1:1; Corning) of MKN45, MKN45-IQGAP1<sup>KO</sup>, MKN45-hnRNP-  
535 M<sup>KO</sup> or double KO cells were injected into the flank of 8-10-week-old NOD-SCID (NOD.CB17-  
536 Prkdcscid/J, Charles River, Strain code: 634). Groups of 11 mice were used per cell type, based on  
537 power analysis performed using the following calculator: [https://www.stat.ubc.ca/~rollin/  
538 stats/ssize/n2.html](https://www.stat.ubc.ca/~rollin/stats/ssize/n2.html). Tumour growth was monitored up to 4 weeks and recorded by measuring two  
539 perpendicular diameters using the formula  $1/2(\text{Length} \times \text{Width}^2)$  bi-weekly (Euhus et al., 1986). At  
540 end-point, mice were euthanized and tumours were collected and enclosed in paraffin for further  
541 analyses.

### 542 **Cell cultures**

543 The human gastric cancer cell lines AGS, KATOIII, MKN45 and NUGC4 were a kind gift from P.  
544 Hatzis (B.S.R.C. “Al. Fleming”, Greece). Cells were grown under standard tissue culture conditions  
545 (37°C, 5% CO<sub>2</sub>) in RPMI medium (GIBCO Cat# 31870025), supplemented with 10% FBS, 1% sodium  
546 pyruvate and 1% penicillin–streptomycin. NUGC4 originated from a proximal metastasis in paragastric  
547 lymph nodes, and MKN45 was derived from liver metastasis. According to the GEMiCCL database,  
548 which incorporates data on cell lines from the Cancer Cell Line Encyclopedia, the Catalogue of  
549 Somatic Mutations in Cancer and NCI60 (Jeong et al., 2018), none of the gastric cancer cell lines  
550 tested have altered copy number of hnRNPM or IQGAP1. Only NUGC4 has a silent mutation c.2103G  
551 to A in *HNRNPM*, which is not included in the Single Nucleotide Variations (SNVs) or mutations  
552 referred by cBioportal in any cancer type (Cerami et al., 2012; Gao et al., 2013).

### 553 **Transfection of MKN45 and NUGC4 cells**

554 Gastric cancer cell lines were transfected with plasmids pDUP51M1, pDUP50M1 or pDUP51-ΔM and  
555 pDUP50-ΔM (a kind gift from D. L. Black, UCLA, USA) and pCMS-EGFP (Takara Bio USA, Inc) or  
556 pEGFP-IQGAP1 (Ren et al., 2005) [a gift from David Sacks (Addgene plasmid# 30112;  
557 <http://n2t.net/addgene:30112>; RRID:Addgene\_30112)], using the TurboFect transfection reagent  
558 (Thermo Fisher Scientific, Inc., MA). For RNA-mediated interference, cells were transfected with  
559 control or hnRNPM-siRNA at 30 nM final concentration and IQGAP1 siRNA at 25 nM final  
560 concentration, using the Lipofectamine RNAiMAX transfection reagent (Thermo Fisher Scientific),  
561 according to manufacturer’s instructions.

## 562 **Subcellular fractionation**

563 The protocol for sub-cellular fractionation was as described before (P. Kafasla et al., 2000). Briefly, for  
564 each experiment, approximately  $1.0 \times 10^7$ - $1.0 \times 10^8$  cells were harvested. The cell pellet was re-  
565 suspended in 3 to 5 volumes of hypotonic Buffer A (10 mM Tris-HCl, pH 7.4, 100 mM NaCl, 2.5 mM  
566  $MgCl_2$ ) supplemented with 0.5 % Triton X-100, protease and phosphatase inhibitors (1 mM NaF, 1  
567 mM  $Na_3VO_4$ ) and incubated on ice for 10 min. Cell membranes were sheared by passing the  
568 suspension 4-6 times through a 26-gauge syringe. Nuclei were isolated by centrifugation at  $3000 \times g$   
569 for 10 min at  $4^\circ C$ , and the supernatant was kept as cytoplasmic extract. The nuclear pellet was  
570 washed once and the nuclei were resuspended in 2 volumes of Buffer A and sonicated twice for 5s  
571 (0.2A). Then, samples were centrifuged at  $4000 \times g$  for 10 min at  $4^\circ C$ . The upper phase, which is the  
572 nuclear extract, was collected, while the nuclear pellet was re-suspended in 2 volumes of 8 M Urea  
573 and stored at  $-20^\circ C$ . Protein concentration of the isolated fractions was assessed using the Bradford  
574 assay (Bradford, 1976).

575 For the subnuclear fractionation protocol that allows for analysis of the LASR complex (Damianov et  
576 al., 2016) cells were harvested, incubated on ice in Buffer B (10 mM HEPES-KOH pH 7.5, 15 mM KCl,  
577 1.5 mM EDTA, 0.15 mM spermine) for 30 min and lysed with the addition of 0.3 % Triton X-100.  
578 Nuclei were collected by centrifugation and further purified by re-suspending the pellet in S1 buffer  
579 (0.25M Sucrose, 10 mM  $MgCl_2$ ) and laid over an equal volume of S2 buffer (0.35 M Sucrose, 0.5 mM  
580  $MgCl_2$ ). Purified nuclei were lysed in ten volumes of ice-cold lysis buffer (20 mM HEPES-KOH pH 7.5,  
581 150 mM NaCl, 1.5 mM  $MgCl_2$ , 0.5 mM DTT and 0.6 % Triton X-100) and nucleosol was separated via  
582 centrifugation from the high molecular weight fraction (pellet). The high molecular weight (HMW)  
583 fraction was subsequently resuspended in Buffer B and treated with either DNase I (0.1 mg/ml) or  
584 RNase A (0.1 mg/ml). The supernatant was collected by centrifugation at  $20,000 \times g$  for 5 min, as the  
585 HMW treated sample.

586 The nuclear matrix fractionation was as previously described (Mähl et al., 1989). Briefly, cells were  
587 harvested and washed with PBS. The cell pellet obtained was re-suspended in five packed-cell-pellet  
588 volumes of buffer A (10 mM Tris-HCl pH 7.5, 2.5 mM  $MgCl_2$ , 100 mM NaCl, 0.5% Triton X-100, 0.5  
589 mM DTT and protease inhibitors) and incubated on ice for 15 min. The cells were then collected by  
590 centrifugation at 2000rpm for 10 min and re-suspended in 2 volumes of buffer A. To break the plasma  
591 membrane a Dounce homogenizer (10 strokes) was used and the cells were checked under the  
592 microscope. After centrifugation at 2000 rpm for 5 min, supernatant was gently removed and kept as  
593 cytoplasmic fraction, while the pellet containing the nuclei was re-suspended in 10 packed nuclear  
594 pellet volumes of S1 solution (0.25 M sucrose, 10 mM  $MgCl_2$ ), on top of which an equal volume of S2  
595 solution (0.35 M sucrose, 0.5 mM  $MgCl_2$ ) was layered. After centrifugation at  $2800 \times g$  for 5 min, the  
596 nuclear pellet was re-suspended in 10 volumes of buffer NM (20 mM HEPES pH 7.4, 150 mM NaCl,  
597 2.5 mM  $MgCl_2$ , 0.6 % Triton X-100 and Protease inhibitors) and lysed on ice for 10 minutes, followed  
598 by centrifugation as above. The supernatant was removed and kept as nuclear extract while the pellet  
599 was re-suspended in buffer A containing DNase I (0.5mg/mL) or RNase A (0.1 mg/mL) and Protease



600 inhibitors and stirred gently at room temperature for 30 minutes. The upper phase defining the nuclear  
601 matrix fraction was quantified and stored at -20°C.

## 602 **Immunoprecipitation**

603 Co-immunoprecipitation of proteins was performed using Protein A/G agarose beads as follows: 20 µl  
604 of bead slurry per immunoprecipitation reaction was washed with NET-2 buffer (10 mM Tris pH 7.5,  
605 150 mM NaCl, 0.05 % NP-40). 4-8 µg of antibody were added to a final volume of 500-600 µL in NET-  
606 2 buffer per sample. Antibody binding was performed by overnight incubation at 4°C on a rotating  
607 wheel. Following the binding of the antibody, beads were washed at least 3 times by resuspension in  
608 NET-2. For each IP sample, 500-1000 µg of protein were added to the beads, in a final volume of 800  
609 µL with NET-2 buffer and incubated for 2 hrs at 4°C on a rotating wheel. After sample binding, beads  
610 were washed 3 times with NET-2 buffer, and twice with NET-2 buffer supplemented with 0.1% Triton  
611 X-100 and a final concentration of 0.1% NP-40. For the UV-crosslinking experiments, beads were  
612 washed five times with wash buffer containing 1M NaCl and twice with standard wash buffer. Co-  
613 immunoprecipitated proteins were eluted from the beads by adding 15-20 µL of 2x Laemmli sample  
614 buffer (0.1 M Tris, 0.012% bromophenol blue, 4 % SDS, 0.95 M β-mercapthoethanol, 12 % glycerol)  
615 and boiled at 95°C for 5 min. Following centrifugation at 10.000 x g for 2 min, the supernatant was  
616 retained and stored at -20°C or immediately used.

## 617 **Western Blot analysis**

618 Cell lysate (7-10 µg for nuclear lysates and 15-20 µg for the cytoplasmic fraction) was resolved on an  
619 8%, 10% or 12 % SDS-polyacrylamide gel and transferred to a polyvinylidenedifluoride membrane  
620 (PVDF, Millipore). Primary antibodies were added and the membranes were incubated overnight at  
621 4°C. Primary antibodies were used at the recommended dilutions (usually 1:1000) in TBS–Tween 5%  
622 milk (w/v) (anti-FZR used at 1:200; anti-TK1 at 1:5000; anti-ANAPC10 at 1:100). HRP-conjugated goat  
623 anti-mouse IgG (1:5000) or HRP-conjugated goat anti-rabbit IgG (1:5000) were used as secondary  
624 antibodies. Detection was carried out using Immobilon Crescendo Western HRP substrate  
625 (WBLUR00500, Millipore).

## 626 **Generation of knockouts**

627 The CRISPR/Cas9 strategy was used to generate IQGAP1 knockout cells (Ran et al., 2013). Exon1  
628 of the *IQGAP1* transcript was targeted using the following pair of synthetic guide RNA (sgRNA)  
629 sequences: Assembly 1: 5'- CACTATGGCTGTGAGTGCG-3' and Assembly 2: 5'- CAGCCCGT  
630 CAACCTCGTCTG-3'. The sequences were identified using the CRISPR Design tool (Ran et al.,  
631 2013). These sequences and their reverse complements were annealed and ligated into the BbSI and  
632 BsaI sites of the All-In-One vector [AIO-Puro, a gift from Steve Jackson (Addgene plasmid #74630;  
633 <http://n2t.net/addgene:74630>; RRID:Addgene\_74630)] (Chiang et al., 2016). The two pairs of  
634 complementary DNA-oligos (Assemblies 1 and 2 including a 4-mer overhang + 20-mer of sgRNA  
635 sequence) were purchased from Integrated DNA technologies (IDT). The insertion of sgRNAs was  
636 verified via sequencing. MKN45 and NUGC4 cells were transfected using Lipofectamine 2000, and

637 clones were selected 48 h later using puromycin. Individual clones were plated to single cell dilution in  
638 24 well-plates, and IQGAP1 deletion was confirmed by PCR of genomic DNA using the following  
639 primers: Forward: 5'-GCCGTCCGCGCCTCCAAG-3'; Reverse: 5'-GTCCGAGCTGCCGGCAGC-3'  
640 and sequencing using the Forward primer. Loss of IQGAP1 protein expression was confirmed by  
641 Western Blotting. MKN45 and NUGC4 cells transfected with AIO-Puro empty vector were selected  
642 with puromycin and used as a control during the clone screening process.

643 For the generation of the *hnRNPM* KO cells we used a different approach. We ordered a synthetic  
644 guide RNA (sgRNA) (5'- CGGCGTGCCGAGCGGCAACG-3'), targeting exon 1 of the *hnRNPM*  
645 transcript, in the form of crRNA from IDT, together with tracrRNA. We assembled the tracrRNA:crRNA  
646 duplex by combining 24pmol of tracrRNA and 24pmol of crRNA in a volume of 5µl, and incubating at  
647 95°C for 5 min, followed by incubation at room temperature. 12pmol of recombinant Cas9 (Protein  
648 Expression and Purification Facility, EMBL, Heidelberg) were mixed with 12pmol of the  
649 tracrRNA:crRNA duplex in OPTIMEM I (GIBCO) for 5min at room temperature and this RNP was  
650 used to transfect MKN45 cells in the presence of Lipofectamine RNAiMax. Cells were harvested 48 h  
651 later and individual clones were isolated and assayed for *hnRNPM* downregulation as described  
652 above for IQGAP1. The primers used were: Forward: 5'- CACGTGGGCGCGCAGG -3'; Reverse: 5'-  
653 GCAAAGGACCGTGGGATACTCAC -3.

#### 654 **Splicing assay**

655 Splicing assays with the DUP51M1 mini-gene reporters were performed as previously described  
656 (Damianov et al., 2016). Briefly, cells were co-transfected with DUP51M1 or DUP51-ΔM site plasmids  
657 and pCMS-EGFP at 1:3 ratio, for 40 h. Total RNA was extracted using TRIzol Reagent® (Thermo  
658 Fisher Scientific) and cDNA was synthesized in the presence of a DUP51-specific primer (DUP51-RT,  
659 5'-AACAGCATCAGGAGTGGACAGATCCC-3'). Analysis of alternative spliced transcripts was carried  
660 out with PCR (15-25 cycles) using primers DUP51S\_F (5'-GACACCATCCAAGGTGCAC-3') and  
661 DUP51S\_R (5'-CTCAAAGAACCTCTGGGTCCAAG-3'), followed by electrophoresis on 8%  
662 acrylamide-urea gel. Quantification of percentage of exon 2 inclusion was performed with ImageJ or  
663 with ImageLab software (version 5.2, Bio-Rad Laboratories) when <sup>32</sup>P-labelled DUP51S\_F primer was  
664 used for the PCR. For the detection of the RNA transcript bound on *hnRNPM* after UV crosslinking,  
665 PCR was performed using primers DUP51UNS\_F (5'-TTGGGTTTCTGATAGGCACTG-3') and  
666 DUP51S\_R (see above).

667 For the validation of the AS events identified by RNA-seq, cDNA was synthesized from total RNA of  
668 appropriate cells in the presence of random hexamer primers and used as a template in PCR with the  
669 primers listed in **Table S4**. % inclusion for each event in 3 or more biological replicates was analysed  
670 in 8% acrylamide-urea gel and quantified by ImageJ.

671 UV-crosslinking experiments were performed as described (Damianov et al., 2016). Briefly, monolayer  
672 MKN45 cell cultures after transfection with the minigene reporters, as described above, were  
673 irradiated with UV (254 nm) at 75 mJ/cm<sup>2</sup> on ice in a UV irradiation system BLX 254 (Vilber Lourmat).

674 UV-irradiated cells were lysed for 5 min on ice with ten packed cell volumes of buffer [20 mM HEPES-  
675 KOH pH 7.5, 150 mM NaCl, 0.5 mM DTT, 1 mM EDTA, 0.6% Triton X-100, 0.1% SDS, and 50mg/ml  
676 yeast tRNA] and centrifuged at 20,000 x g for 5 min at 4°C. The supernatants were 5 x diluted with  
677 buffer [20 mM HEPES-KOH pH 7.5, 150 mM NaCl, 0.5 mM DTT, 1 mM EDTA, 1.25x Complete  
678 protease inhibitors (Roche), and 50 µg/ml yeast tRNA]. Lysates were centrifuged for 10 min at 20,000  
679 x g, 4°C prior to IP.

#### 680 **Colony-Formation assay**

681 In 6-well plates, 200 cells/well were placed and allowed to grow for 7 days at 37°C with 5% CO<sub>2</sub>.  
682 Formed colonies were fixed with 0.5mL of 100% methanol for 20min at RT. Methanol was then  
683 removed and cells were carefully rinsed with H<sub>2</sub>O. 0.5ml crystal violet staining solution (0.5% crystal  
684 violet in 10% ethanol) was added to each well and cells were left for 5min at RT. The plates were then  
685 washed with H<sub>2</sub>O until excess dye was removed and were left to dry. The images were captured by  
686 Molecular Imager® ChemiDoc™ XRS+ Gel Imaging System (Bio-Rad) and colonies were quantified  
687 using ImageJ software.

#### 688 **Wound healing assay**

689 Cells were cultured in 24-well plates at 37°C with 5% CO<sub>2</sub> in a monolayer, until nearly 90% confluent.  
690 Scratches were then made with a sterile 200µl pipette tip and fresh medium without FBS was gently  
691 added. The migration of cells in the same wound area was visualized at 0, 8, 24, 32 and 48 hrs using  
692 Axio Observer A1 (Zeiss) microscope with automated stage.

#### 693 **Cell Cycle Analysis**

694 The cells were seeded in 6-well plates at a density of 3×10<sup>5</sup> cells/well. When cells reached 60-80%  
695 confluence, they were harvested by trypsinization into phosphate-buffered saline (PBS). The pellets  
696 were fixed in 70% ethanol and stored at -20°C till all time-points were collected. On the day of the  
697 FACS analysis, cell pellets were washed in phosphate-citrate buffer and centrifuged for 20min. 250µl  
698 of RNase/propidium iodide (PI) solution were then added to each sample (at concentrations of  
699 100µg/ml for RNase and 50µg/ml for PI) and cells were incubated at 37°C for 30min. Finally, the cells  
700 were analysed through flow cytometric analysis using FACSCanto™ II (BD-Biosciences).

#### 701 **Immunostaining**

702 For immunofluorescence, cells were seeded on glass coverslips and were left to adhere for 24 hrs.  
703 Cells were next fixed for 10 minutes with 4% paraformaldehyde PFA (Alfa Aesar), followed by  
704 permeabilization with 0.25% (w/v) Triton X-100. Cells were then incubated for 30 min in 5% BSA/PBS  
705 (phosphate buffer saline). The primary antibodies used for immunostaining were: anti-hnRNPM (1:300,  
706 clone 1D8), anti-IQGAP1 (1:500). For β-tubulin staining, cells were fixed in -20°C with ice-cold  
707 methanol for 3 minutes, blocked in 1% BSA/PBS solution and incubated overnight with the primary  
708 antibody (1:250). After washing with PBS, cells were incubated with secondary antibodies (anti-rabbit-  
709 Alexa Fluor 555 or anti-mouse Alexa Fluor 488, both used at 1:500) at room temperature for 1h

710 followed by the staining of nuclei with DAPI for 5 min at RT. For mounting Mowiol mounting medium  
711 (Sigma-Aldrich) was used and the images were acquired with Leica DM2000 fluorescence  
712 microscope or a LEICA SP8 White Light Laser confocal system and were analysed using the Image J  
713 software.

714 Tissue Microarrays (TMA) slides were purchased from US Biomax, Inc (cat. no. T012a). The slides  
715 were deparaffinized in xylene and hydrated in different alcohol concentrations. Heat-induced antigen  
716 retrieval in citrate buffer pH 6.0 was used. Blocking, incubation with first and secondary antibodies as  
717 well as the nuclei staining and mounting, were performed as mentioned above.

### 718 **Microscopy and image analysis.**

719 Fluorescent images were acquired with a Leica TCS SP8 X confocal system equipped with an argon  
720 and a supercontinuum white light laser source, using the LAS AF software (Leica). The same  
721 acquisition settings were applied for all samples in the same experiment. Pixel-based colocalization  
722 analysis was performed with the Image J software, using the “Colocalization Threshold” plugin  
723 (Costes et al., 2004) to calculate the Pearson correlation coefficient. Image background was  
724 subtracted using the “Subtract background” function of Image J (50px ball radius). For each image,  
725 the middle slices representing the cell nuclei (selected as regions of interest (ROI) based on the DAPI  
726 signal) were chosen for analysis and at least 30 cells or more were analysed for each cell line.  
727 Intensity plot profiles (k-plots) were generated using the “Plot profile” function of Image J. After  
728 background subtraction (as mentioned above), a line was drawn across each cell and the pixel grey  
729 values for hnRNPM, SR & PSF signals were acquired. Adobe Photoshop CS6 was used for merging  
730 the final images, where brightness and contrast were globally adjusted.

731 For the quantification of the distribution of the signal of hnRNPM in the nucleus, 40 nuclei were  
732 quantified for each cell line and for each condition. The background was subtracted using Image J  
733 software, for all images, followed by the selection of the nuclei for further analysis. For the nuclei  
734 intensity measurements, the CellProfiler software (<https://cellprofiler.org/>)(McQuin et al., 2018) was  
735 used. Two different modules were applied: First, the *IdentifyPrimaryObjects* module, in order to define  
736 the nuclei as primary objects followed by the *MeasureObjectIntensityDistribution* module, which  
737 allowed us to quantify the spatial distribution of intensities from each object's center to its boundary  
738 within a set of rings. In our case, the number of rings set was 4, for each analyzed nucleus.  
739 CellProfiler software was used also for the quantification of IQGAP1 signal in TMA slides. For each  
740 channel representing DAPI and IQGAP1 staining, the *LowerQuartile* intensity (*MeasureImageIntensity*  
741 module) was measured and subtracted from the total intensity (*ImageMath* module). To define the  
742 nuclei and cell borders, we used *IdentifyPrimaryObjects* and *IdentifySecondaryObjects* modules,  
743 respectively. IQGAP1 signal intensity was measured (*MeasureObjectIntensity* module) within the  
744 secondary objects previously selected. *IntegratedIntensity* values obtained were used for further  
745 analysis. The statistical analysis was performed using GraphPad and Unpaired t-test. For a significant  
746 difference between intensity mean,  $P < 0.05$ .

## 747 **Immunohistochemistry and H&E staining**

748 At the end of the xenograft experiment tumours were dissected from the mice, fixed in formalin and  
749 embedded in paraffin. Sections were cut at 5  $\mu$ m thickness, were de-paraffinized and stained for  
750 haematoxylin and eosin. For IHC, after de-paraffinization serial sections were hydrated, incubated in  
751 3% H<sub>2</sub>O<sub>2</sub> solution for 10 minutes, washed and boiled at 95°C for 15 minutes in sodium citrate buffer  
752 pH 6.0 for antigen retrieval. Blocking was performed with 5% BSA for 1 hr and sections were then  
753 incubated with the following primary antibodies overnight at 4°C diluted in BSA: anti Ki-67 (1:200),  
754 hnRNP-M (1:100), IQGAP1 (1:100). Sections were subsequently washed and incubated with the  
755 appropriate secondary antibody conjugated to HRP, HRP-conjugated goat anti-mouse IgG (1:5000) or  
756 HRP-conjugated goat anti-rabbit IgG (1:5000) and the DAB Substrate Kit was used to visualise the  
757 signal. The sections were counterstained with hematoxylin and imaged with a NIKON Eclipse E600  
758 microscope, equipped with a Qcapture camera.

## 759 **Proximity ligation assay**

760 Cells were grown on coverslips (13 mM diameter, VWR) and fixed for 10 min with 4% PFA (Alfa  
761 Aesar), followed by 10 min permeabilization with 0.25% Triton X-100 in PBS and blocking with 5%  
762 BSA in PBS for 30 min. Primary antibodies: anti-hnRNPM (1:500), anti-IQGAP1 (1:500), anti- $\beta$ -actin  
763 (1:200), and anti-SUMO2/3 (1:50) diluted in blocking buffer were added and incubated overnight at  
764 4°C. Proximity ligation assays were performed using the Duolink kit (Sigma-Aldrich DUO92102),  
765 according to manufacturer's protocol. Images were collected using a Leica SP8 confocal microscope.

## 766 **RNA isolation and reverse transcription**

767 Total RNA was extracted with the TRIzol® reagent (Thermo Fisher Scientific). DNA was removed with  
768 RQ1 RNase-free DNase (Promega, WI) or DNase I (RNase-free, New England Biolabs, Inc, MA),  
769 followed by phenol extraction. Reverse transcription was carried with 0.4-1  $\mu$ g total RNA in the  
770 presence of gene-specific or random hexamer primers, RNaseOUT™ Recombinant Ribonuclease  
771 Inhibitor (Thermo Fisher Scientific) and SuperScript® III (Thermo Fisher Scientific) or Protoscript II  
772 (New England Biolabs) reverse transcriptase, according to manufacturer's instructions.

## 773 **Mass spectrometry and Proteomics analysis**

774 Anti-IQGAP1 immunoprecipitation samples were processed in collaboration with the Core Proteomics  
775 Facility at EMBL Heidelberg. Proteomics analysis was performed as follows: samples were dissolved  
776 in 2x Laemmli sample buffer, and underwent filter-assisted sample preparation (FASP) to produce  
777 peptides with proteolytic digestion. These were then tagged using 4 different multiplex TMT isobaric  
778 tags (ThermoFisher Scientific, TMTsixplex™ Isobaric Label Reagent Set): one isotopically unique tag  
779 for each IP condition, namely IQGAP1 IP cancer (NUGC4) and the respective IgG control. TMT-  
780 tagged samples were appropriately pooled and analysed using HPLC-MS/MS. Three biological  
781 replicates for each IP condition were processed.

782 Samples were processed using the ISOBARQuant (Breitwieser et al., 2011), an R-package platform  
783 for the analysis of isobarically labelled quantitative proteomics data. Only proteins that were quantified  
784 with two unique peptide matches were filtered. After batch-cleaning and normalization of raw signal  
785 intensities, fold-change was calculated. Statistical analysis of results was performed using the LIMMA  
786 (Smyth, 2004) R-package, making comparisons between each IQGAP1 IP sample and their  
787 respective IgG controls. A protein was considered significant if it had a  $P < 5\%$  (Benjamini-Hochberg  
788 FDR adjustment), and a fold-change of at least 50% between compared conditions. Identified proteins  
789 were classified into 3 categories: Hits (FDR threshold= 0.05, fold change=2), candidates (FDR  
790 threshold = 0.25, fold change = 1.5), and no hits (see **Table S1**).

791 For the differential proteome analysis of MKN45 and MKN45-*IQGAP1*<sup>KO</sup> cells, whole cell lysates were  
792 prepared in RIPA buffer [25 mM Tris-HCl (pH 7.5), 150 mM NaCl, 1% NP-40, 0.5% sodium  
793 deoxycholate, 0.1% SDS). Samples underwent filter-assisted sample preparation (FASP) to produce  
794 peptides with proteolytic digestion<sup>61</sup> and analysed using HPLC-MS/MS. The full dataset is being  
795 prepared to be published elsewhere.

#### 796 **RNA-seq analysis**

797 Total TRIzol-extracted RNA was treated with RQ1-RNase free DNase (Promega). cDNA libraries  
798 were prepared in collaboration with Genecore, at EMBL, Heidelberg. Alternative splicing was  
799 analyzed by using VAST-TOOLS v2.2.2 (Irimia et al., 2014) and expressed as changes in percent-  
800 spliced-in values ( $\Delta$ PSI). A minimum read coverage of 10 junction reads per sample was required, as  
801 described (Irimia et al., 2014). Psi values for single replicates were quantified for all types of  
802 alternative events. Events showing splicing change ( $|\Delta$ PSI|> 15 with minimum range of 5% between  
803 control and *IQGAP1*-KO samples were considered *IQGAP1*-regulated events.

#### 804 **ORF impact prediction**

805 Potential ORF impact of alternative exons was predicted as described (Irimia et al., 2014). Exons  
806 were mapped on the coding sequence (CDS) or 5'/3' untranslated regions (UTR) of genes. Events  
807 mapping on the CDS were divided in CDS-preserving or CDS-disrupting.

#### 808 **RNA maps analysis**

809 We compared sequence of introns surrounding exons showing more inclusion or skipping in *IQGAP1*-  
810 KO samples with a set of 1,050 not changing alternative exons. To generate the RNA maps, we used  
811 the *rna\_maps* function (Gohr & Irimia, 2019), using sliding windows of 15 nucleotides. Searches were  
812 restricted to the affected exons, the first and last 500 nucleotides of the upstream and downstream  
813 intron and 50 nucleotides into the upstream and downstream exons. Regular expression was used to  
814 search for the binding motif of hnRNPM (GTGGTGG|GGTTGGTT|GTGTTGT|TGTTGGAG or  
815 GTGGTGG|GGTTGGTT|TGGTGG|GGTGG). RNA maps for the hnRNPM motif (Huelga et al., 2012)  
816 were analyzed using *Matt* software v1.3.0 (Gohr & Irimia, 2019). Cassette exons were grouped as  
817 follows: up  $\Delta$ PSI >15 and PSI margin between groups >5, down  $\Delta$ PSI < -15 and PSI margin between

818 groups >5. The sequence of first and last 50 nt of exons and the first and last 500nt of introns (sliding  
819 window = 15, p value  $\leq 0.05$  with 1000 permutations) were compared with the non-changing exons  
820 (ndiff -2> $\Delta$ PSI >2 and average PSI controls < 95 and  $\Delta$ PSI  $\leq 5$ ).

## 821 **Gene Ontology**

822 Enrichment for GO terms was analysed using ShinyGO v0.61 with P value cut-off (FDR) set at 0.05.

## 823 **Quantification and Statistical Analysis**

824 Data were analysed using GraphPad Prism 7 software (GraphPad Software). Student's t test  
825 (comparisons between two groups), one-way ANOVA were used as indicated in the legends. p <0.05  
826 was considered statistically significant.

827

## 828 **ACCESSION NUMBERS**

829 The mass spectrometry proteomics data have been deposited to the ProteomeXchange Consortium  
830 via the PRIDE<sup>69</sup> partner repository with the dataset identifier PXD017842.

831 RNA-seq data have been deposited in GEO: GSE146283.

832

## 833 **SUPPLEMENTARY DATA**

834 Supplementary Data are available at NAR online.

835

## 836 **ACKNOWLEDGEMENT**

837 We thank N. Boni-Kazantzidou and G.-R. Manikas for the generation of crucial preliminary data; P.  
838 Hantzis, M. Fousteri, V. Koliaraki (IFBR, B.S.R.C. "Al. Fleming") and N. Balatsos (University of  
839 Thessaly, Greece) for cell lines and reagents; D. Black and A. Damianov (UCLA, USA) for plasmids  
840 and technical advice on minigene reporter splicing assays; A. Guialis (N.H.R.F., Athens, Greece) for  
841 antibodies and reagents; Per Haberkant and the EMBL Proteomics Core Facility for LC-MS/MS  
842 analyses and advice; Sofia Grammenoudi and the Flow cytometry facility of B.S.R.C. "Al. Fleming" for  
843 help with cell cycle analyses and discussions; Vladimir Benes, Jonathan Landry and the EMBL  
844 Genecore for RNA-seq analyses and discussions; Martina Samiotaki, George Stamatakis at the  
845 Proteomics Facility of B.S.R.C. "Al. Fleming" for LC-MS/MS analyses and discussions; the personnel  
846 of the Imaging facility of B.S.R.C. "Al. Fleming" for help with image acquisition. We also thank George  
847 Panayotou and Efthimios Skoulakis (B.S.R.C. "Al. Fleming") for critical reading of the manuscript;  
848 Juan Valcarcel for help with the analysis of the RNA-seq data; Skarlatos G. Dedos (National and

849 Kapodistrian University of Athens, Greece) for reagents, plasmids, discussions and critical reading of  
850 the manuscript.

851

## 852 **FUNDING**

853 InfrafrontierGR/Phenotypos Infrastructure, co-funded by Greece and the European Union (European  
854 Regional Development Fund) [NSRF 2014-2020, MIS 5002135]; Hellenic Foundation for Research &  
855 Innovation (HFRI) and the General Secretariat for Research and Technology (GSRT) [grant  
856 agreement 846 to Z.E.]; M.R. was supported by the European Research Council [ERC AdvG 670146];  
857 European Commission Grant FP7-PEOPLE-2010-IEF [274837] to P.K;  
858 Stavros Niarchos Foundation (SNF) donation to BSRC “Al. Fleming”.

## 859 **CONFLICT OF INTEREST**

860 The authors declare no conflict of interest.

## 861 **REFERENCES**

- 862 Alfieri, C., Zhang, S., & Barford, D. (2017). Visualizing the complex functions and  
863 mechanisms of the anaphase promoting complex/cyclosome (APC/C). *Open Biology*,  
864 7(11). <https://doi.org/10.1098/rsob.170204>
- 865 Benary, M., Bohn, S., Lüthen, M., Nolis, I. K., Blüthgen, N., & Loewer, A. (2020).  
866 Disentangling Pro-mitotic Signaling during Cell Cycle Progression using Time-  
867 Resolved Single-Cell Imaging. *Cell Reports*, 31(2), 107514.  
868 <https://doi.org/10.1016/j.celrep.2020.03.078>
- 869 Biamonti, G., & Cáceres, J. F. (2009). Cellular stress and RNA splicing. *Trends in*  
870 *Biochemical Sciences*, 34(3), 146–153. <https://doi.org/10.1016/j.tibs.2008.11.004>
- 871 Blaustein, M., Pelisch, F., Tanos, T., Muñoz, M. J., Wengier, D., Quadrana, L., Sanford, J.  
872 R., Muschietti, J. P., Kornblihtt, A. R., Cáceres, J. F., Coso, O. A., & Srebrow, A.  
873 (2005). Concerted regulation of nuclear and cytoplasmic activities of SR proteins by  
874 AKT. *Nature Structural & Molecular Biology*, 12(12), 1037–1044.  
875 <https://doi.org/10.1038/nsmb1020>



- 876 Bradford, M. M. (1976). A rapid and sensitive method for the quantitation of microgram  
877 quantities of protein utilizing the principle of protein-dye binding. *Analytical*  
878 *Biochemistry*, *72*, 248–254. <https://doi.org/10.1006/abio.1976.9999>
- 879 Breitwieser, F. P., Müller, A., Dayon, L., Köcher, T., Hainard, A., Pichler, P., Schmidt-Erfurth,  
880 U., Superti-Furga, G., Sanchez, J.-C., Mechtler, K., Bennett, K. L., & Colinge, J.  
881 (2011). General statistical modeling of data from protein relative expression isobaric  
882 tags. *Journal of Proteome Research*, *10*(6), 2758–2766.  
883 <https://doi.org/10.1021/pr1012784>
- 884 Cerami, E., Gao, J., Dogrusoz, U., Gross, B. E., Sumer, S. O., Aksoy, B. A., Jacobsen, A.,  
885 Byrne, C. J., Heuer, M. L., Larsson, E., Antipin, Y., Reva, B., Goldberg, A. P.,  
886 Sander, C., & Schultz, N. (2012). The cBio cancer genomics portal: An open platform  
887 for exploring multidimensional cancer genomics data. *Cancer Discovery*, *2*(5), 401–  
888 404. <https://doi.org/10.1158/2159-8290.CD-12-0095>
- 889 Cherry, S., & Lynch, K. W. (2020). Alternative splicing and cancer: Insights, opportunities,  
890 and challenges from an expanding view of the transcriptome. *Genes & Development*,  
891 *34*(15–16), 1005–1016. <https://doi.org/10.1101/gad.338962.120>
- 892 Chiang, T.-W. W., le Sage, C., Larrieu, D., Demir, M., & Jackson, S. P. (2016). CRISPR-  
893 Cas9D10A nickase-based genotypic and phenotypic screening to enhance genome  
894 editing. *Scientific Reports*, *6*. <https://doi.org/10.1038/srep24356>
- 895 Choi, Y. D., & Dreyfuss, G. (1984). Isolation of the heterogeneous nuclear RNA-  
896 ribonucleoprotein complex (hnRNP): A unique supramolecular assembly.  
897 *Proceedings of the National Academy of Sciences of the United States of America*,  
898 *81*(23), 7471–7475.
- 899 Costes, S. V., Daelemans, D., Cho, E. H., Dobbin, Z., Pavlakis, G., & Lockett, S. (2004).  
900 Automatic and Quantitative Measurement of Protein-Protein Colocalization in Live  
901 Cells. *Biophysical Journal*, *86*(6), 3993–4003.  
902 <https://doi.org/10.1529/biophysj.103.038422>

- 903 Cvitkovic, I., & Jurica, M. S. (2013). Spliceosome database: A tool for tracking components  
904 of the spliceosome. *Nucleic Acids Research*, *41*(Database issue), D132-141.  
905 <https://doi.org/10.1093/nar/gks999>
- 906 da Fonseca, P. C. A., Kong, E. H., Zhang, Z., Schreiber, A., Williams, M. A., Morris, E. P., &  
907 Barford, D. (2011). Structures of APC/C(Cdh1) with substrates identify Cdh1 and  
908 Apc10 as the D-box co-receptor. *Nature*, *470*(7333), 274–278.  
909 <https://doi.org/10.1038/nature09625>
- 910 Damianov, A., Ying, Y., Lin, C.-H., Lee, J.-A., Tran, D., Vashisht, A. A., Bahrami-Samani, E.,  
911 Xing, Y., Martin, K. C., Wohlschlegel, J. A., & Black, D. L. (2016). Rbfox Proteins  
912 Regulate Splicing as Part of a Large Multiprotein Complex LASR. *Cell*, *165*(3), 606–  
913 619. <https://doi.org/10.1016/j.cell.2016.03.040>
- 914 Denegri, M., Chiodi, I., Corioni, M., Cobianchi, F., Riva, S., & Biamonti, G. (2001). Stress-  
915 induced Nuclear Bodies Are Sites of Accumulation of Pre-mRNA Processing Factors.  
916 *Molecular Biology of the Cell*, *12*(11), 3502–3514.  
917 <https://doi.org/10.1091/mbc.12.11.3502>
- 918 Dominguez, D., Tsai, Y.-H., Weatheritt, R., Wang, Y., Blencowe, B. J., & Wang, Z. (2016).  
919 An extensive program of periodic alternative splicing linked to cell cycle progression.  
920 *ELife*, *5*, e10288. <https://doi.org/10.7554/eLife.10288>
- 921 El Marabti, E., & Younis, I. (2018). The Cancer Spliceome: Reprogramming of Alternative  
922 Splicing in Cancer. *Frontiers in Molecular Biosciences*, *5*.  
923 <https://doi.org/10.3389/fmolb.2018.00080>
- 924 Engström, Y., Eriksson, S., Jildevik, I., Skog, S., Thelander, L., & Tribukait, B. (1985). Cell  
925 cycle-dependent expression of mammalian ribonucleotide reductase. Differential  
926 regulation of the two subunits. *Journal of Biological Chemistry*, *260*(16), 9114–9116.  
927 <http://www.jbc.org/content/260/16/9114>
- 928 Euhus, D. M., Hudd, C., LaRegina, M. C., & Johnson, F. E. (1986). Tumor measurement in  
929 the nude mouse. *Journal of Surgical Oncology*, *31*(4), 229–234.  
930 <https://doi.org/10.1002/jso.2930310402>

- 931 Gao, J., Aksoy, B. A., Dogrusoz, U., Dresdner, G., Gross, B., Sumer, S. O., Sun, Y.,  
932 Jacobsen, A., Sinha, R., Larsson, E., Cerami, E., Sander, C., & Schultz, N. (2013).  
933 Integrative analysis of complex cancer genomics and clinical profiles using the  
934 cBioPortal. *Science Signaling*, 6(269), p1. <https://doi.org/10.1126/scisignal.2004088>
- 935 Garbett, D., & Bretscher, A. (2014). The surprising dynamics of scaffolding proteins.  
936 *Molecular Biology of the Cell*, 25(16), 2315–2319. [https://doi.org/10.1091/mbc.e14-](https://doi.org/10.1091/mbc.e14-04-0878)  
937 04-0878
- 938 Gattoni, R., Mahé, D., Mähl, P., Fischer, N., Mattei, M. G., Stévenin, J., & Fuchs, J. P.  
939 (1996). The human hnRNP-M proteins: Structure and relation with early heat shock-  
940 induced splicing arrest and chromosome mapping. *Nucleic Acids Research*, 24(13),  
941 2535–2542. <https://www.ncbi.nlm.nih.gov/pmc/articles/PMC145970/>
- 942 Gijn, S. E. van, Wierenga, E., Tempel, N. van den, Kok, Y. P., Heijink, A. M., Spierings, D. C.  
943 J., Foijer, F., Vugt, M. A. T. M. van, & Fehrmann, R. S. N. (2019). TPX2/Aurora  
944 kinase A signaling as a potential therapeutic target in genomically unstable cancer  
945 cells. *Oncogene*, 38(6), 852–867. <https://doi.org/10.1038/s41388-018-0470-2>
- 946 Gohr, A., & Irimia, M. (2019). Matt: Unix tools for alternative splicing analysis. *Bioinformatics*,  
947 35(1), 130–132. <https://doi.org/10.1093/bioinformatics/bty606>
- 948 Heyd, F., & Lynch, K. W. (2011). Degrade, move, regroup: Signaling control of splicing  
949 proteins. *Trends in Biochemical Sciences*, 36(8), 397–404.  
950 <https://doi.org/10.1016/j.tibs.2011.04.003>
- 951 Hu, W., Wang, Z., Zhang, S., Lu, X., Wu, J., Yu, K., Ji, A., Lu, W., Wang, Z., Wu, J., & Jiang,  
952 C. (2019). IQGAP1 promotes pancreatic cancer progression and epithelial-  
953 mesenchymal transition (EMT) through Wnt/ $\beta$ -catenin signaling. *Scientific Reports*,  
954 9(1), 7539. <https://doi.org/10.1038/s41598-019-44048-y>
- 955 Huelga, S. C., Vu, A. Q., Arnold, J. D., Liang, T. Y., Liu, P. P., Yan, B. Y., Donohue, J. P.,  
956 Shiue, L., Hoon, S., Brenner, S., Ares, M., & Yeo, G. W. (2012). Integrative Genome-  
957 wide Analysis Reveals Cooperative Regulation of Alternative Splicing by hnRNP  
958 Proteins. *Cell Reports*, 1(2), 167–178. <https://doi.org/10.1016/j.celrep.2012.02.001>

- 959 Irimia, M., Weatheritt, R. J., Ellis, J. D., Parikshak, N. N., Gonatopoulos-Pournatzis, T.,  
960 Babor, M., Quesnel-Vallières, M., Tapial, J., Raj, B., O'Hanlon, D., Barrios-Rodiles,  
961 M., Sternberg, M. J. E., Cordes, S. P., Roth, F. P., Wrana, J. L., Geschwind, D. H., &  
962 Blencowe, B. J. (2014). A Highly Conserved Program of Neuronal Microexons Is  
963 Misregulated in Autistic Brains. *Cell*, *159*(7), 1511–1523.  
964 <https://doi.org/10.1016/j.cell.2014.11.035>
- 965 Jeong, I., Yu, N., Jang, I., Jun, Y., Kim, M.-S., Choi, J., Lee, B., & Lee, S. (2018). GEMiCCL:  
966 Mining genotype and expression data of cancer cell lines with elaborate visualization.  
967 *Database*, *2018*. <https://doi.org/10.1093/database/bay041>
- 968 Johnson, M. A., Sharma, M., Mok, M. T. S., & Henderson, B. R. (2013). Stimulation of in vivo  
969 nuclear transport dynamics of actin and its co-factors IQGAP1 and Rac1 in response  
970 to DNA replication stress. *Biochimica et Biophysica Acta (BBA) - Molecular Cell*  
971 *Research*, *1833*(10), 2334–2347. <https://doi.org/10.1016/j.bbamcr.2013.06.002>
- 972 Johnson, M., Sharma, M., Brocardo, M. G., & Henderson, B. R. (2011). IQGAP1  
973 translocates to the nucleus in early S-phase and contributes to cell cycle progression  
974 after DNA replication arrest. *The International Journal of Biochemistry & Cell Biology*,  
975 *43*(1), 65–73. <https://doi.org/10.1016/j.biocel.2010.09.014>
- 976 Kafasla, P., Patrino-Georgoula, M., & Guialis, A. (2000). The 72/74-kDa polypeptides of the  
977 70-110 S large heterogeneous nuclear ribonucleoprotein complex (LH-nRNP)  
978 represent a discrete subset of the hnRNP M protein family. *The Biochemical Journal*,  
979 *350 Pt 2*, 495–503.
- 980 Kafasla, Panayiota, Patrino-Georgoula, M., Lewis, J. D., & Guialis, A. (2002). Association of  
981 the 72/74-kDa proteins, members of the heterogeneous nuclear ribonucleoprotein M  
982 group, with the pre-mRNA at early stages of spliceosome assembly. *The Biochemical*  
983 *Journal*, *363*(Pt 3), 793–799. <https://doi.org/10.1042/0264-6021:3630793>
- 984 Kahles, A., Lehmann, K.-V., Toussaint, N. C., Hüser, M., Stark, S. G., Sachsenberg, T.,  
985 Stegle, O., Kohlbacher, O., Sander, C., Caesar-Johnson, S. J., Demchok, J. A.,  
986 Felau, I., Kasapi, M., Ferguson, M. L., Hutter, C. M., Sofia, H. J., Tarnuzzer, R.,

- 987 Wang, Z., Yang, L., ... Rättsch, G. (2018). Comprehensive Analysis of Alternative  
988 Splicing Across Tumors from 8,705 Patients. *Cancer Cell*, 34(2), 211-224.e6.  
989 <https://doi.org/10.1016/j.ccell.2018.07.001>
- 990 Langeberg, L. K., & Scott, J. D. (2015). Signalling scaffolds and local organization of cellular  
991 behaviour. *Nature Reviews. Molecular Cell Biology*, 16(4), 232–244.  
992 <https://doi.org/10.1038/nrm3966>
- 993 Levine, M. S., & Holland, A. J. (2018). The impact of mitotic errors on cell proliferation and  
994 tumorigenesis. *Genes & Development*, 32(9–10), 620–638.  
995 <https://doi.org/10.1101/gad.314351.118>
- 996 Li, S., Wang, Q., Chakladar, A., Bronson, R. T., & Bernards, A. (2000). Gastric Hyperplasia  
997 in Mice Lacking the Putative Cdc42 Effector IQGAP1. *Molecular and Cellular Biology*,  
998 20(2), 697–701. <https://doi.org/10.1128/MCB.20.2.697-701.2000>
- 999 Lian, A. T., Hains, P. G., Sarcevic, B., Robinson, P. J., & Chircop, M. (2015). IQGAP1 is  
1000 associated with nuclear envelope reformation and completion of abscission. *Cell*  
1001 *Cycle*, 14(13), 2058–2074. <https://doi.org/10.1080/15384101.2015.1044168>
- 1002 Liebelt, F., Sebastian, R. M., Moore, C. L., Mulder, M. P. C., Ovaa, H., Shoulders, M. D., &  
1003 Vertegaal, A. C. O. (2019). SUMOylation and the HSF1-Regulated Chaperone  
1004 Network Converge to Promote Proteostasis in Response to Heat Shock. *Cell*  
1005 *Reports*, 26(1), 236-249.e4. <https://doi.org/10.1016/j.celrep.2018.12.027>
- 1006 Llères, D., Denegri, M., Biggiogera, M., Ajuh, P., & Lamond, A. I. (2010). Direct interaction  
1007 between hnRNP-M and CDC5L/PLRG1 proteins affects alternative splice site choice.  
1008 *EMBO Reports*, 11(6), 445–451. <https://doi.org/10.1038/embor.2010.64>
- 1009 Mähl, P., Lutz, Y., Puvion, E., & Fuchs, J. P. (1989). Rapid effect of heat shock on two  
1010 heterogeneous nuclear ribonucleoprotein-associated antigens in HeLa cells. *The*  
1011 *Journal of Cell Biology*, 109(5), 1921–1935. <https://doi.org/10.1083/jcb.109.5.1921>
- 1012 Marko, M., Leichter, M., Patrino-Georgoula, M., & Guialis, A. (2010). HnRNP M interacts  
1013 with PSF and p54(nrb) and co-localizes within defined nuclear structures.

- 1014 *Experimental Cell Research*, 316(3), 390–400.
- 1015 <https://doi.org/10.1016/j.yexcr.2009.10.021>
- 1016 Matic, I., Schimmel, J., Hendriks, I. A., van Santen, M. A., van de Rijke, F., van Dam, H.,  
1017 Gnad, F., Mann, M., & Vertegaal, A. C. O. (2010). Site-Specific Identification of  
1018 SUMO-2 Targets in Cells Reveals an Inverted SUMOylation Motif and a Hydrophobic  
1019 Cluster SUMOylation Motif. *Molecular Cell*, 39(4), 641–652.
- 1020 <https://doi.org/10.1016/j.molcel.2010.07.026>
- 1021 Matter, N., Herrlich, P., & König, H. (2002). Signal-dependent regulation of splicing via  
1022 phosphorylation of Sam68. *Nature*, 420(6916), 691–695.
- 1023 <https://doi.org/10.1038/nature01153>
- 1024 McQuin, C., Goodman, A., Chernyshev, V., Kametsky, L., Cimini, B. A., Karhohs, K. W.,  
1025 Doan, M., Ding, L., Rafelski, S. M., Thirstrup, D., Wiegraebe, W., Singh, S., Becker,  
1026 T., Caicedo, J. C., & Carpenter, A. E. (2018). CellProfiler 3.0: Next-generation image  
1027 processing for biology. *PLOS Biology*, 16(7), e2005970.
- 1028 <https://doi.org/10.1371/journal.pbio.2005970>
- 1029 Meissner, M., Dechat, T., Gerner, C., Grimm, R., Foisner, R., & Saueremann, G. (2000).  
1030 Differential nuclear localization and nuclear matrix association of the splicing factors  
1031 PSF and PTB. *Journal of Cellular Biochemistry*, 76(4), 559–566.
- 1032 Neumayer, G., Belzil, C., Gruss, O. J., & Nguyen, M. D. (2014). TPX2: Of spindle assembly,  
1033 DNA damage response, and cancer. *Cellular and Molecular Life Sciences: CMLS*,  
1034 71(16), 3027–3047. <https://doi.org/10.1007/s00018-014-1582-7>
- 1035 Oltean, S., & Bates, D. O. (2013). Hallmarks of alternative splicing in cancer. *Oncogene*.  
1036 <https://doi.org/10.1038/onc.2013.533>
- 1037 Osman, M. A., Sarkar, F. H., & Rodriguez-Boulan, E. (2013). A molecular rheostat at the  
1038 interface of cancer and diabetes. *Biochimica Et Biophysica Acta*, 1836(1), 166–176.  
1039 <https://doi.org/10.1016/j.bbcan.2013.04.005>

- 1040 Pan, Q., Shai, O., Lee, L. J., Frey, B. J., & Blencowe, B. J. (2008). Deep surveying of  
1041 alternative splicing complexity in the human transcriptome by high-throughput  
1042 sequencing. *Nature Genetics*, *40*(12), 1413–1415. <https://doi.org/10.1038/ng.259>
- 1043 Passacantilli, I., Frisone, P., De Paola, E., Fidaleo, M., & Paronetto, M. P. (2017). HnRNPM  
1044 guides an alternative splicing program in response to inhibition of the  
1045 PI3K/AKT/mTOR pathway in Ewing sarcoma cells. *Nucleic Acids Research*, *45*(21),  
1046 12270–12284. <https://doi.org/10.1093/nar/gkx831>
- 1047 Penas, C., Ramachandran, V., & Ayad, N. G. (2011). The APC/C Ubiquitin Ligase: From Cell  
1048 Biology to Tumorigenesis. *Frontiers in Oncology*, *1*, 60.  
1049 <https://doi.org/10.3389/fonc.2011.00060>
- 1050 Popp, M. W.-L., & Maquat, L. E. (2013). Organizing principles of mammalian nonsense-  
1051 mediated mRNA decay. *Annual Review of Genetics*, *47*, 139–165.  
1052 <https://doi.org/10.1146/annurev-genet-111212-133424>
- 1053 Pozzi, B., Bragado, L., Will, C. L., Mammi, P., Risso, G., Urlaub, H., Lührmann, R., &  
1054 Srebrow, A. (2017). SUMO conjugation to spliceosomal proteins is required for  
1055 efficient pre-mRNA splicing. *Nucleic Acids Research*, *45*(11), 6729–6745.  
1056 <https://doi.org/10.1093/nar/gkx213>
- 1057 Ran, F. A., Hsu, P. D., Wright, J., Agarwala, V., Scott, D. A., & Zhang, F. (2013). Genome  
1058 engineering using the CRISPR-Cas9 system. *Nature Protocols*, *8*(11), 2281–2308.  
1059 <https://doi.org/10.1038/nprot.2013.143>
- 1060 Rando, O. J., Zhao, K., & Crabtree, G. R. (2000). Searching for a function for nuclear actin.  
1061 *Trends in Cell Biology*, *10*(3), 92–97. [https://doi.org/10.1016/S0962-8924\(99\)01713-4](https://doi.org/10.1016/S0962-8924(99)01713-4)
- 1062 Rappsilber, J., Ryder, U., Lamond, A. I., & Mann, M. (2002). Large-Scale Proteomic Analysis  
1063 of the Human Spliceosome. *Genome Research*, *12*(8), 1231–1245.  
1064 <https://doi.org/10.1101/gr.473902>
- 1065 Ren, J.-G., Li, Z., Crimmins, D. L., & Sacks, D. B. (2005). Self-association of IQGAP1:  
1066 Characterization and functional sequelae. *The Journal of Biological Chemistry*,  
1067 *280*(41), 34548–34557. <https://doi.org/10.1074/jbc.M507321200>

- 1068 Rhind, N., & Russell, P. (2012). Signaling Pathways that Regulate Cell Division. *Cold Spring*  
1069 *Harbor Perspectives in Biology*, 4(10). <https://doi.org/10.1101/cshperspect.a005942>
- 1070 Rosenbaum, J. C., Fredrickson, E. K., Oeser, M. L., Garrett-Engle, C. M., Locke, M. N.,  
1071 Richardson, L. A., Nelson, Z. W., Hetrick, E. D., Milac, T. I., Gottschling, D. E., &  
1072 Gardner, R. G. (2011). Disorder targets disorder in nuclear quality control  
1073 degradation: A disordered ubiquitin ligase directly recognizes its misfolded  
1074 substrates. *Molecular Cell*, 41(1), 93–106.  
1075 <https://doi.org/10.1016/j.molcel.2010.12.004>
- 1076 Sansregret, L., Patterson, J. O., Dewhurst, S., López-García, C., Koch, A., McGranahan, N.,  
1077 Chao, W. C. H., Barry, D. J., Rowan, A., Instrell, R., Horswell, S., Way, M., Howell,  
1078 M., Singleton, M. R., Medema, R. H., Nurse, P., Petronczki, M., & Swanton, C.  
1079 (2017). APC/C Dysfunction Limits Excessive Cancer Chromosomal Instability.  
1080 *Cancer Discovery*, 7(2), 218–233. <https://doi.org/10.1158/2159-8290.CD-16-0645>
- 1081 Santos, A., Wernersson, R., & Jensen, L. J. (2015). Cyclebase 3.0: A multi-organism  
1082 database on cell-cycle regulation and phenotypes. *Nucleic Acids Research*, 43(D1),  
1083 D1140–D1144. <https://doi.org/10.1093/nar/gku1092>
- 1084 Saraiva-Agostinho, N., & Barbosa-Morais, N. L. (2019). psichomics: Graphical application for  
1085 alternative splicing quantification and analysis. *Nucleic Acids Research*, 47(2), e7.  
1086 <https://doi.org/10.1093/nar/gky888>
- 1087 Shalgi, R., Hurt, J. A., Lindquist, S., & Burge, C. B. (2014). Widespread Inhibition of  
1088 Posttranscriptional Splicing Shapes the Cellular Transcriptome following Heat Shock.  
1089 *Cell Reports*, 7(5), 1362–1370. <https://doi.org/10.1016/j.celrep.2014.04.044>
- 1090 Sharma, S., Findlay, G. M., Bandukwala, H. S., Oberdoerffer, S., Baust, B., Li, Z., Schmidt,  
1091 V., Hogan, P. G., Sacks, D. B., & Rao, A. (2011). Dephosphorylation of the nuclear  
1092 factor of activated T cells (NFAT) transcription factor is regulated by an RNA-protein  
1093 scaffold complex. *Proceedings of the National Academy of Sciences of the United*  
1094 *States of America*, 108(28), 11381–11386. <https://doi.org/10.1073/pnas.1019711108>



- 1095 Sherley, J. L., & Kelly, T. J. (1988). Regulation of human thymidine kinase during the cell  
1096 cycle. *The Journal of Biological Chemistry*, 263(17), 8350–8358.
- 1097 Smith, J. M., Hedman, A. C., & Sacks, D. B. (2015). IQGAPs choreograph cellular signaling  
1098 from the membrane to the nucleus. *Trends in Cell Biology*, 25(3), 171–184.  
1099 <https://doi.org/10.1016/j.tcb.2014.12.005>
- 1100 Smyth, G. K. (2004). Linear models and empirical bayes methods for assessing differential  
1101 expression in microarray experiments. *Statistical Applications in Genetics and*  
1102 *Molecular Biology*, 3, Article3. <https://doi.org/10.2202/1544-6115.1027>
- 1103 Suganuma, T., Mushegian, A., Swanson, S. K., Abmayr, S. M., Florens, L., Washburn, M.  
1104 P., & Workman, J. L. (2010). The ATAC acetyltransferase complex coordinates MAP  
1105 kinases to regulate JNK target genes. *Cell*, 142(5), 726–736.  
1106 <https://doi.org/10.1016/j.cell.2010.07.045>
- 1107 Sveen, A., Kilpinen, S., Ruusulehto, A., Lothe, R. A., & Skotheim, R. I. (2015). Aberrant RNA  
1108 splicing in cancer; expression changes and driver mutations of splicing factor genes.  
1109 *Oncogene*. <https://doi.org/10.1038/onc.2015.318>
- 1110 van der Houven van Oordt, W., Diaz-Meco, M. T., Lozano, J., Krainer, A. R., Moscat, J., &  
1111 Cáceres, J. F. (2000). The Mkk3/6-p38–Signaling Cascade Alters the Subcellular  
1112 Distribution of Hnrnp A1 and Modulates Alternative Splicing Regulation. *The Journal*  
1113 *of Cell Biology*, 149(2), 307–316.  
1114 <https://www.ncbi.nlm.nih.gov/pmc/articles/PMC2175157/>
- 1115 Van Nostrand, E. L., Pratt, G. A., Shishkin, A. A., Gelboin-Burkhart, C., Fang, M. Y.,  
1116 Sundararaman, B., Blue, S. M., Nguyen, T. B., Surka, C., Elkins, K., Stanton, R.,  
1117 Rigo, F., Guttman, M., & Yeo, G. W. (2016). Robust transcriptome-wide discovery of  
1118 RNA-binding protein binding sites with enhanced CLIP (eCLIP). *Nature Methods*,  
1119 13(6), 508–514. <https://doi.org/10.1038/nmeth.3810>
- 1120 Wang, Z., & Burge, C. B. (2008). Splicing regulation: From a parts list of regulatory elements  
1121 to an integrated splicing code. *RNA*, 14(5), 802–813.  
1122 <https://doi.org/10.1261/rna.876308>

- 1123 White, C. D., Brown, M. D., & Sacks, D. B. (2009). IQGAPs in cancer: A family of scaffold  
1124 proteins underlying tumorigenesis. *FEBS Letters*, *583*(12), 1817–1824.  
1125 <https://doi.org/10.1016/j.febslet.2009.05.007>
- 1126 Yamano, H. (2019). APC/C: Current understanding and future perspectives.  
1127 *F1000Research*, *8*. <https://doi.org/10.12688/f1000research.18582.1>
- 1128 Zhong, X.-Y., Ding, J.-H., Adams, J. A., Ghosh, G., & Fu, X.-D. (2009). Regulation of SR  
1129 protein phosphorylation and alternative splicing by modulating kinetic interactions of  
1130 SRPK1 with molecular chaperones. *Genes & Development*, *23*(4), 482–495.  
1131 <https://doi.org/10.1101/gad.1752109>
- 1132 Zhou, Zhihong, Qiu, J., Liu, W., Zhou, Y., Plocinik, R. M., Li, H., Hu, Q., Ghosh, G., Adams,  
1133 J. A., Rosenfeld, M. G., & Fu, X.-D. (2012). The Akt-SRPK-SR Axis Constitutes a  
1134 Major Pathway in Transducing EGF Signaling to Regulate Alternative Splicing in the  
1135 Nucleus. *Molecular Cell*, *47*(3), 422–433.  
1136 <https://doi.org/10.1016/j.molcel.2012.05.014>
- 1137 Zhou, Zhuan, He, M., Shah, A. A., & Wan, Y. (2016). Insights into APC/C: From cellular  
1138 function to diseases and therapeutics. *Cell Division*, *11*, 9.  
1139 <https://doi.org/10.1186/s13008-016-0021-6>

1140

## 1141 TABLE AND FIGURES LEGENDS

1142 **Figure 1: IQGAP1 expression levels are significantly increased in gastric cancer cells. (A)**  
1143 Representative epifluorescence images of normal and adenocarcinoma gastric tissues on a  
1144 commercial tissue microarray. Tissues were immunostained with rabbit anti-IQGAP1 antibodies. DAPI  
1145 was used for nuclei staining. The same settings for IQGAP1 signal acquisition were applied in all  
1146 samples. **(B)** Quantification of IQGAP1 fluorescence signal intensity in normal and gastric tumour  
1147 samples. Cell segmentation and Integrated Intensity measurements were performed with Cell Profiler  
1148 (<https://cellprofiler.org/>) (McQuin et al., 2018). At least 285 cells were analysed in each tissue sample.  
1149 Statistical analysis with one-way ANOVA showed that the mean integrated intensities of the tissue  
1150 samples are significantly different ( $P < 0.05$ ).  $P$  values presented in the graphs were calculated with  
1151 multiple comparisons ANOVA between the normal and tumour samples ( $**P < 0.01$ ). **(C)** Expression  
1152 box plots showing the *IQGAP1* mRNA levels in tumour samples from esophagogastric cancers (STES)  
1153 or Stomach Adenocarcinoma (STAD) patients in comparison to TCGA normal data. The expression

1154 levels are indicated in  $\log_2(\text{TPM} + 1)$  values. The analysis was performed using the psichomics  
1155 interphase (Saraiva-Agostinho & Barbosa-Morais, 2019). The TCGA data used were: Stomach  
1156 adenocarcinoma 2016-01-28, 410 samples (358 patient and 21 normal); Stomach and Esophageal  
1157 carcinoma 2016-01-28, 594 samples (539 patient and 55 normal). *P* values were calculated using  
1158 two-tailed, unpaired t-tests, where  $***P < 0.001$ . **(D)** Immunoblotting of crude protein extracts from  
1159 different gastric cancer cell lines against IQGAP1.  $\beta$ -actin was used to normalize IQGAP1 levels.  
1160 Quantification was performed using ImageLab software version 5.2 (Bio-Rad Laboratories). AGS:  
1161 gastric adenocarcinoma; MKN45: poorly differentiated gastric adenocarcinoma, liver metastasis;  
1162 KATOIII: gastric carcinoma, pleural effusion and supraclavicular and axillary lymph nodes and  
1163 Douglas cul-de-sac pleural; NUGC4: poorly differentiated signet-ring cell gastric adenocarcinoma,  
1164 gastric lymph node. Numbers indicate MW in kDa. See also **Supplementary Figure S1**.

1165 **Figure 2. Nuclear IQGAP1 is a component of RNPs involved in splicing regulation. (A)**  
1166 Representative confocal images of MKN45 and NUGC4 cells stained with an anti-IQGAP1 antibody  
1167 and DAPI to visualise the nuclei. Single confocal nuclear slices are shown for each fluorescence  
1168 signal and for the merged image. Cross sections of the xz and yz axes show the presence of IQGAP1  
1169 within the cell nuclei. **(B)** Network of protein interactions generated from the proteins that were pulled  
1170 down by anti-IQGAP1 Abs from nuclear extracts of NUGC4 cells and classified as spliceosomal  
1171 components. The network was generated using the igraph R package. Colours represent classes of  
1172 spliceosomal components according to SpliceosomeDB (Cvitkovic & Jurica, 2013). Vertices are  
1173 scaled according to *P* values and ordered according to known spliceosomal complexes. **(C)** Validation  
1174 of representative IQGAP1-interacting partners presented in **(B)**. Anti-IQGAP1 or control IgG pull down  
1175 from nuclear extracts of NUGC4 and MKN45 cells were immunoprobed against IQGAP1, hnRNPA1,  
1176 hnRNPA2/B1, hnRNPC1/C2, hnRNPL, hnRNPM and DHX9. The immunoprecipitated proteins were  
1177 compared to 1/70<sup>th</sup> of the input used in the pull down. Where indicated, RNase A was added in the  
1178 pull down for 30 min. Numbers indicate MW in kDa. See also **Supplementary Figure S2**.

1179 **Figure 3. IQGAP1 participates in alternative splicing regulation in gastric cancer cell lines. (A)**  
1180 NUGC4, NUGC4-*IQGAP1*<sup>KO</sup>, MKN45 and MKN45-*IQGAP1*<sup>KO</sup> cells were transfected with the  
1181 DUP51M1 minigene general splicing reporter (Damianov et al., 2016) for 40 hrs. Exon 2 (grey box)  
1182 splicing was assessed by RT-PCR using primers located at the flanking exons. Quantification of exon  
1183 2 inclusion was performed using ImageJ. Data shown represent the average % of exon 2 inclusion  
1184 values from at least 3 independent experiments. **(B)** Pie chart presenting the frequency of the  
1185 different types of AS events (exon skipping, intron retention, alternative splice donor and alternative  
1186 splice acceptor) regulated by IQGAP1 in MKN45 cells. **(C)** Plot showing the distribution of the  $\Delta\Psi$   
1187 values for the different types of AS events. Background events (BG) are presented in grey and in  
1188 orange are the significantly changing ones. **(D)** Histogram showing the results from the GO Biological  
1189 process enrichment analysis of the AS events that are significantly affected by IQGAP1 deletion. **(E-F)**  
1190 Analysis by RT-PCR and gel electrophoresis of cell cycle-related AS events in MKN45 and MKN45-  
1191 *IQGAP1*<sup>KO</sup> cells (all 19 events are shown in **Supplementary Tables S3, S4**). In **(E)**, 6 events are  
1192 presented whose inclusion was down-regulated upon *IQGAP1*<sup>KO</sup> in MKN45 cells (*SDCCAG3*, *FIP1L1*,

1193 *ACOT9*, *CROCC*, *MRI1* and *ANAPC10*). In **(F)**, 6 events are presented whose inclusion was up-  
1194 regulated in MKN45-*IQGAP1*<sup>KO</sup> compared to MKN45 (*ARHGAP27*, *TRPM4*, *RBM10*, *PSIP1*, *CENPV*  
1195 and *KIF2A*). % inclusion represents the mean of at least 3 biological replicates. Molecular lengths (bp)  
1196 are marked on the right of each picture. In red are the products that result from the AS event of  
1197 interest and were considered in the quantification of % inclusion. In grey are the products that were  
1198 not considered in quantification. **(G)** RNA map representing the distribution of hnRNPM binding motif  
1199 in hnRNPM regulated exons and flanking introns, compared to control exons. Thicker segments  
1200 indicate regions in which enrichment of hnRNPM motif is significantly different. The reported hnRNPM  
1201 motifs (Huelga et al., 2012) were identified only down-stream of the down-regulated exons. See also  
1202 Supplementary **Figures S3 and S4**.

1203 **Figure 4. IQGAP1 interacts with hnRNPM in the nucleus of gastric cancer cells to control its**  
1204 **regulatory role in splicing. (A-B)** Proximity ligation assay (PLA) in MKN45 and NUGC4 cells  
1205 showing the direct nuclear interaction between hnRNPM and IQGAP1. In **(A)** representative images  
1206 display a central plane from confocal z-stacks for the 2 cell lines. Negative control (secondary  
1207 antibody only, MKN45 C and NUGC4 C) samples show minimal background signal. In **(B)**,  
1208 quantification of the nuclear (n.MKN45 and n.NUGC4) and cytoplasmic signal (c.MKN45 and  
1209 c.NUGC4) was performed per cell using the DuoLink kit-associated software. Each plot represents at  
1210 least 15 cells analysed. *P* values were calculated using ANOVA multiple comparisons tests; \*\*\*\**P* <  
1211 0.0001. **(C-D)** MKN45 and MKN45-*IQGAP1*<sup>KO</sup> cells were transfected with the DUP51M1 (hnRNPM  
1212 responsive) or DUP51-ΔM (hnRNPM non-responsive) minigene splicing reporters (Damianov et al.,  
1213 2016) for 40 hrs. Exon 2 (grey box) splicing was assessed by RT-PCR using primers located at the  
1214 flanking exons. Quantification of exon 2 inclusion was performed using ImageJ. Data shown in **(D)**  
1215 represent the average exon 2 inclusion values ± SD from at least 3 independent experiments. *P*  
1216 values were calculated using unpaired, two-tailed, unequal variance Student's t-test. **(E)** As in **(C)**  
1217 cells transfected with DUP51M1 minigene were UV cross-linked and lysed under denaturing  
1218 conditions. RNA:protein crosslinks were immunoprecipitated with an anti-hnRNPM antibody. hnRNPM  
1219 or GAPDH in the lysates (lanes: input) and immunoprecipitates (lanes: IP) were detected by  
1220 immunoblot. RT-PCR was used to detect DUP51M1 pre-mRNA and GAPDH mRNA. Graph shows the  
1221 amounts of co-precipitated RNA normalised to the IgG negative control and to the amount of  
1222 hnRNPM protein that was pulled-down in each IP. Bars represent mean values ± SD from 3  
1223 independent experiments. See also Supplementary **Figure S5**.

1224 **Figure 5. IQGAP1 regulates hnRNPM's splicing activity by controlling its subnuclear**  
1225 **distribution in cancer cells. (A-B)** Single confocal planes of MKN45 and MKN45-*IQGAP1*<sup>KO</sup> cells  
1226 stained for hnRNPM, IQGAP1 and DAPI **(A)**. hnRNPM signal alone is shown in grey for better  
1227 visualisation and merged images with all three coloured signals are shown on the side. Quantification  
1228 in **(B)** of the intensity of the hnRNPM signal. Intensity Distribution analysis was performed as  
1229 described in STAR methods for 40 cells per cell line. Data represent mean values ± SD. *P* values  
1230 were calculated using unpaired t-tests; \*\*\*\**P* < 0.0001, \*\**P* < 0.01 **(C)** Representative stacks from  
1231 confocal images of MKN45 and MKN45-*IQGAP1*<sup>KO</sup> cells untreated or after heat-shock (42°C, 1 h, HS)

1232 stained for hnRNPM and SR proteins. For each condition the single and merged signals of the 2  
1233 proteins are shown on top. A single cell stained for hnRNPM and SR is shown on the bottom together  
1234 with the plot profile line drawn in Image J, while the accompanying pixel grey value graphs are visible  
1235 on the right of the image. **(D)** Histogram showing the Pearson's coefficient values for hnRNPM and  
1236 SR co-localisation, for MKN45 and MKN45-*IQGAP1*<sup>KO</sup> cells before and after heat-shock stress  
1237 induction. Pixel-based co-localisation was performed in 36 cells for each condition, and data  
1238 represent mean values  $\pm$  SD. *P* values were calculated using ANOVA multiple comparisons tests;  
1239 \*\*\*\**P* < 0.0001. **(E-F)** MKN45 and MKN45-*IQGAP1*<sup>KO</sup> cells were transfected with the DUP50M1  
1240 (hnRNPM responsive, **(E)**) or DUP50- $\Delta$ M (hnRNPM non-responsive, **(F)**) minigene splicing reporters  
1241 (Damianov et al., 2016) for 40 hrs. Exon 2 (grey box) splicing was assessed by RT-PCR before  
1242 (untreated, U) or after heat-shock (42°C 1h, HS). Quantification of exon 2 inclusion was performed  
1243 using ImageJ. Data shown represent the average exon 2 inclusion values  $\pm$  SD from at least 3  
1244 independent experiments. *P* values were calculated using unpaired, two-tailed, unequal variance  
1245 Student's t-test. See also Supplementary **Figure S6**.

1246 **Figure 6. IQGAP1 is necessary for changes in the sumoylation status of hnRNPM and**  
1247 **regulates its exchange between the nuclear matrix and the splicing machinery. (A)** Immunoblot  
1248 of nuclear matrix extracts from MKN45 and MKN45-*IQGAP1*<sup>KO</sup> cells before (-HS) and after heat-shock  
1249 (45°C, 15 min, + HS) probed against hnRNPM and IQGAP1.  $\beta$ -actin is used as a loading control  
1250 (Rando et al., 2000). Quantification of the relevant protein amounts, in arbitrary units, was performed  
1251 using ImageLab software version 5.2 (Bio-Rad Laboratories). **(B)** Histogram showing the Pearson's  
1252 coefficient values of hnRNPM and PSF co-localisation for MKN45 and MKN45-*IQGAP1*<sup>KO</sup> cells before  
1253 (untreated) and after heat-shock stress induction for 1h at 42°C (HS). Pixel-based co-localisation (see  
1254 Panel C for example images) was performed in 30 cells for each condition, and data represent mean  
1255 values  $\pm$  SD. *P* values were calculated using ANOVA multiple comparisons tests; \*\*\*\**P* < 0.0001. **(C)**  
1256 Representative confocal planes of MKN45 and MKN45-*IQGAP1*<sup>KO</sup> cells before (untreated) and after  
1257 heat-shock stress induction for 1h at 42°C (HS), stained for hnRNPM and PSF. For each cell type and  
1258 condition both the single and merged signals of the 2 proteins are shown on top. A slice from a single  
1259 cell stained for hnRNPM and PSF is visible on the bottom together with the plot profile line drawn in  
1260 Image J, while the accompanying pixel grey value graphs are shown on the right of the image. **(D)**  
1261 Anti-hnRNPM or control IgG (IgG) pull downs from nuclear extracts of MKN45 and MKN45-*IQGAP1*<sup>KO</sup>  
1262 cells as for (D) were analysed by an 8% SDS-PAGE. Detection of SUMO2/3 conjugated proteins was  
1263 performed by immunoblot using an anti-SUMO2/3 antibody. After stripping of the antibody from the  
1264 membrane, hnRNPM was also detected by immunoblot using specific antibodies (lower part). The  
1265 immunoprecipitated proteins were compared to 1/70th of the input used in the pull down. Asterisks (\*)  
1266 indicate sumoylated hnRNPM species. **(E)** Proximity ligation assay (PLA) in MKN45 and MKN45-  
1267 *IQGAP1*<sup>KO</sup> cells before (untreated) and after heat-shock stress induction for 1h at 42°C (HS), showing  
1268 the SUMO2/3-conjugated hnRNPM. Quantification of the nuclear signal of a central plane from  
1269 confocal z-stacks was performed per cell using CellProfiler (McQuin et al., 2018). Each plot  
1270 represents at least 120 cells analysed. *P* values were calculated using ANOVA multiple comparisons  
1271 tests; \*\*\*\**P* < 0.0001. See also Supplementary **Figure S7**.

1272 **Figure 7. IQGAP1 and hnRNPM co-regulate the function of APC/C through AS of the ANAPC10**  
1273 **pre-mRNA and promote gastric cancer cell growth *in vitro* and *in vivo*.** (A) Scatterplot showing  
1274 the distribution of the Psi values for the AS events detected by VAST-TOOLS in RNA-seq in  
1275 *IQGAP1<sup>KO</sup>* and control cells. In yellow are the significantly changed AS events between MKN45 and  
1276 MKN45-*IQGAP1<sup>KO</sup>* cells ( $|\Delta\Psi| > 15$ , range 5), in ochre and orange are events with detected iClip  
1277 binding for hnRNPM or predicted RNA-binding motif, respectively. The gene names of the events that  
1278 were screened for validation are indicated. The *ANAPC10* event is shown in bold. BG: background.  
1279 (B) RT-PCR (see Table S4) followed by electrophoresis was used to monitor the rate of ANAPC10  
1280 exon 4 inclusion in MKN45 and MKN45-*IQGAP1<sup>KO</sup>* cells transfected with siRNAs for hnRNPM or  
1281 scrambled (scr) control siRNAs. Exon 4 inclusion was quantified with ImageJ in at least 3 biological  
1282 replicates. P value was calculated with unpaired t-test. (C) Volcano plot of the log<sub>2</sub>fc change in  
1283 protein levels between MKN45 and MKN45-*IQGAP1<sup>KO</sup>*. In red are the protein-targets of the APC/C  
1284 complex that were found to be up-regulated in the KO cells. IQGAP1 and hnRNPM are also indicated.  
1285 (D) Cell cycle analysis of asynchronous MKN45-derived cell lines (MKN45, MKN45-*IQGAP1<sup>KO</sup>*,  
1286 MKN45-*hnRNPM<sup>KO</sup>* and double MKN45-*IQGAP1<sup>KO</sup>*-*hnRNPM<sup>KO</sup>*) using propidium iodide staining  
1287 followed by FACS analysis. Quantification of the percentage of cells in each cell cycle phase was  
1288 performed with FlowJo software. Data represent mean values  $\pm$  SD of two independent experiments.  
1289  $***P < 0.001$ ,  $****P < 0.0001$ . (E) Non-synchronized cells from all four cell groups were stained for  $\beta$ -  
1290 tubulin and DAPI, to visualize the cell cytoplasm and nucleus, respectively. Quantification of the  
1291 percentage of cells having 1x, 2x or >2x nuclei was performed in 20 images from each cell line,  
1292 reaching a minimum number of 250 cells analysed per group. (F) MKN45, MKN45-*IQGAP1<sup>KO</sup>*,  
1293 MKN45-*hnRNPM<sup>KO</sup>* and MKN45-*hnRNPM<sup>KO</sup>*-*IQGAP1<sup>KO</sup>* cells were subcutaneously injected into the  
1294 flanks of NOD/SCID mice and tumours were left to develop over a period of 28 days. The tumour  
1295 growth graph shows the increase of tumour volume (mm<sup>3</sup>) over time. Tumour size was measured in  
1296 anaesthetised mice with a digital caliper twice per week, and at the end-point of the experiment when  
1297 tumours were excised. Data presented are average values  $\pm$  SD, from 11 mice per group. P values  
1298 were calculated using one-way ANOVA, where  $*P < 0.05$ ,  $**P < 0.01$ ,  $****P < 0.0001$ . See also  
1299 Supplementary **Figures S8** and **S9**.

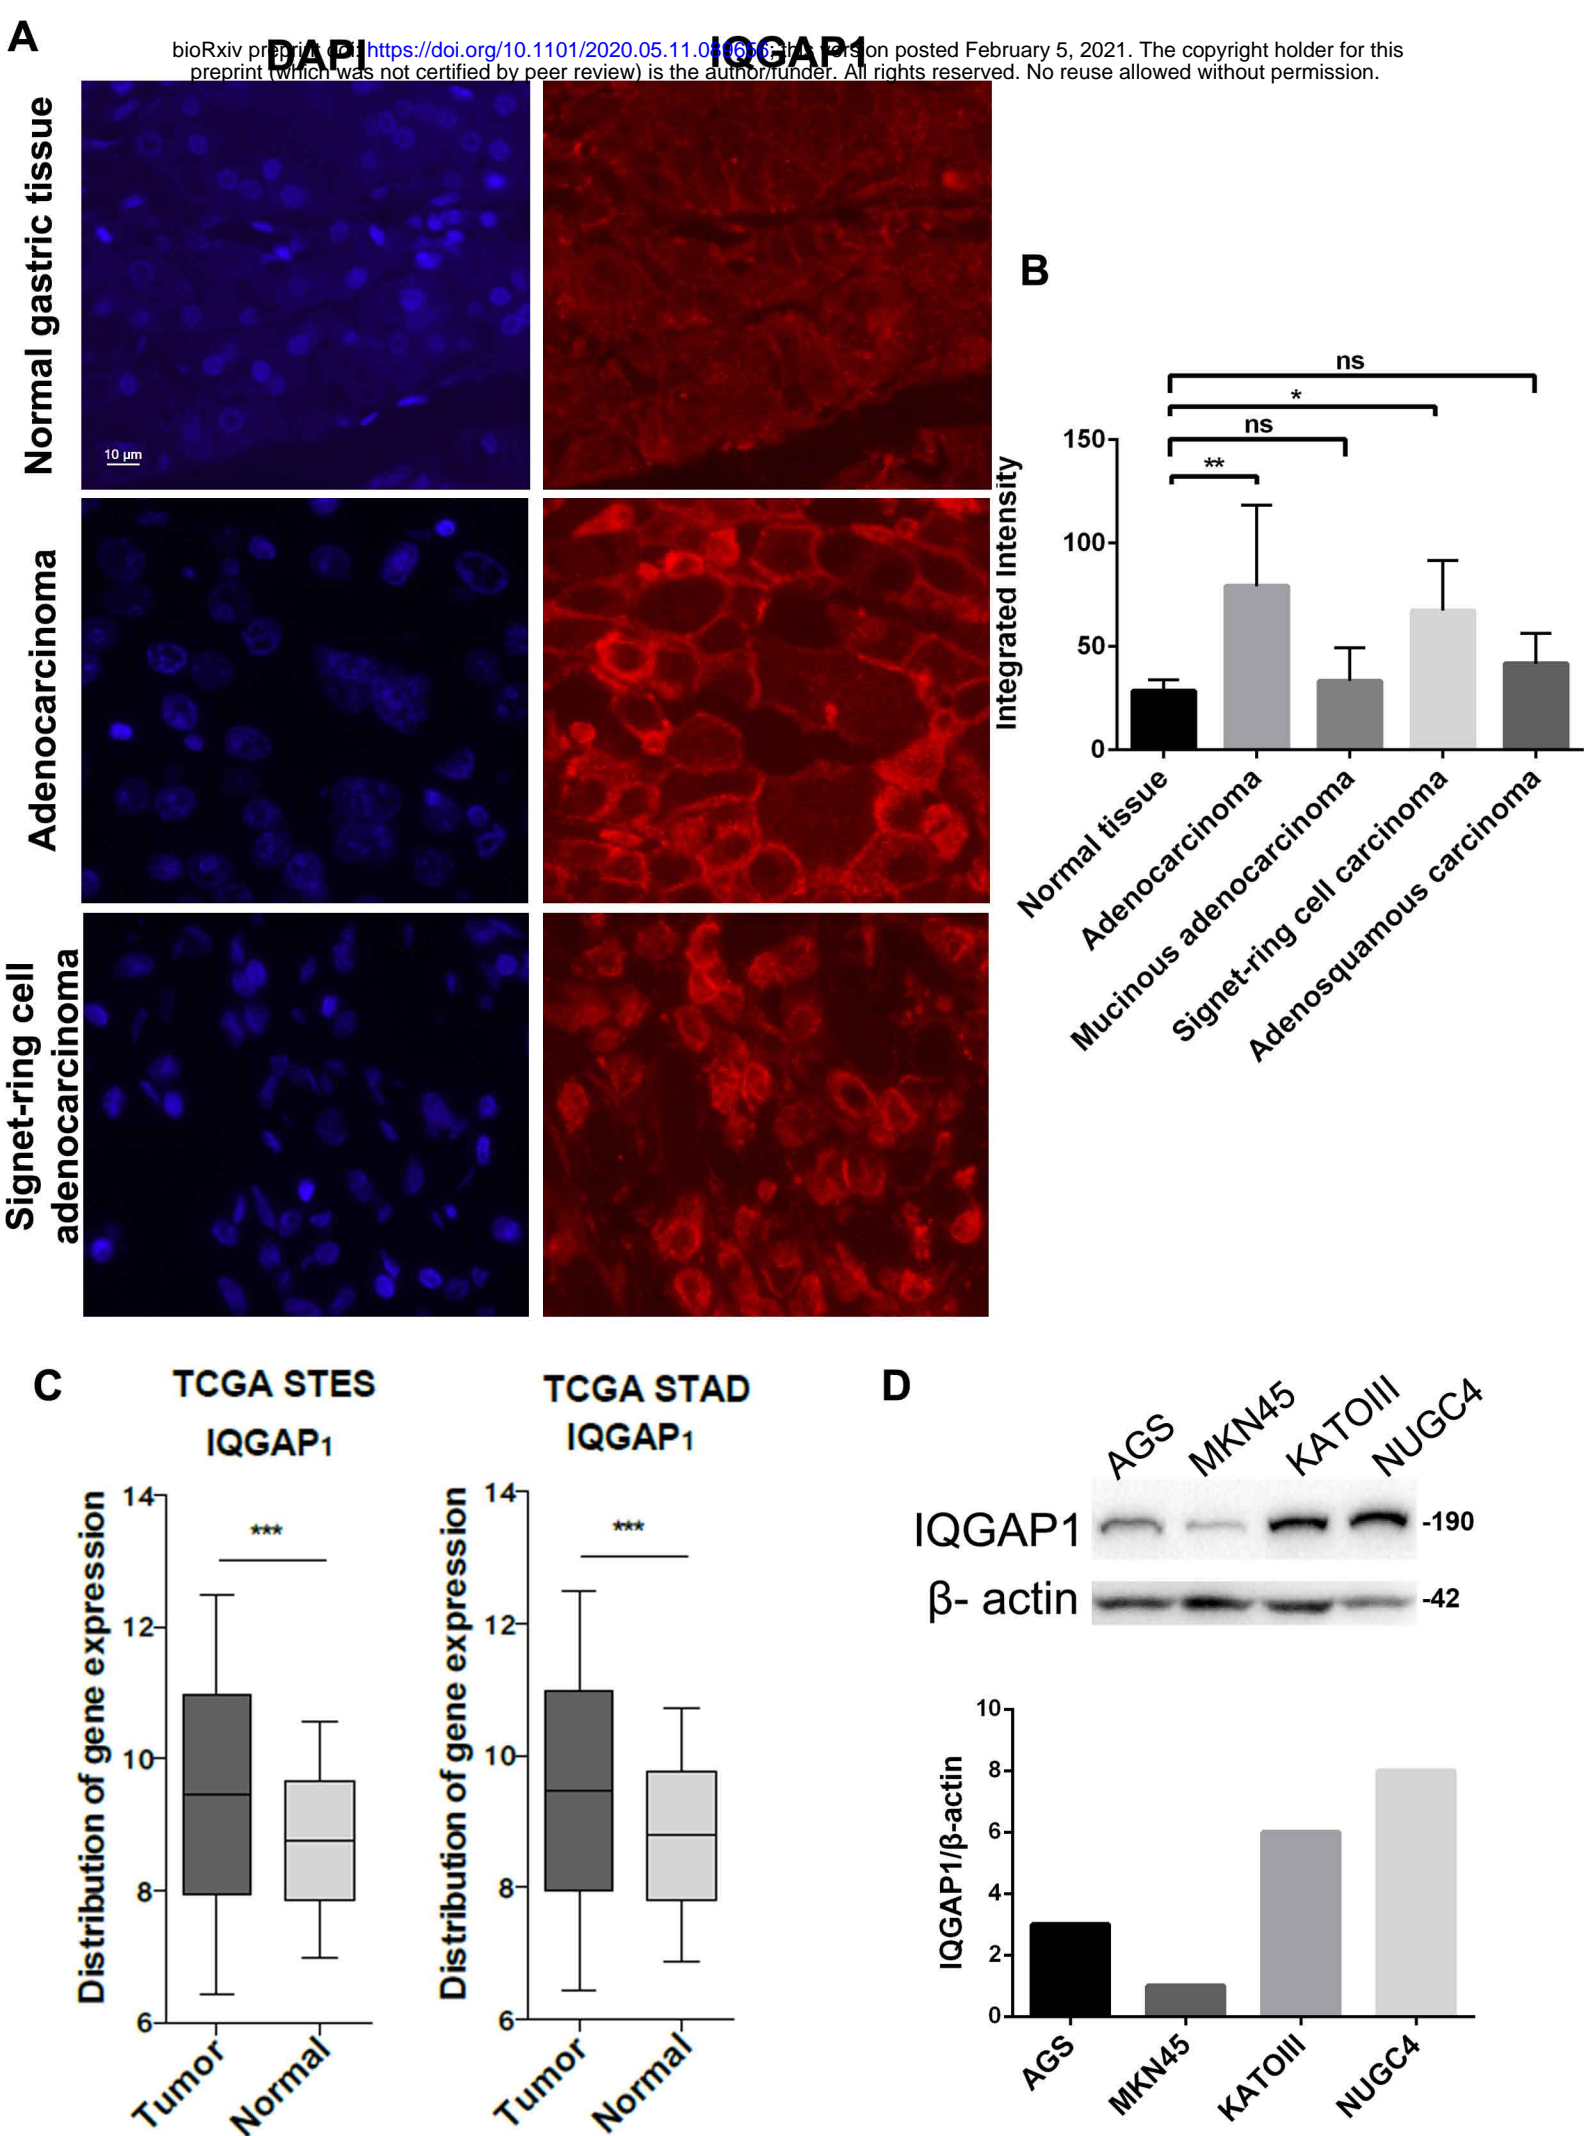

**Figure 1**

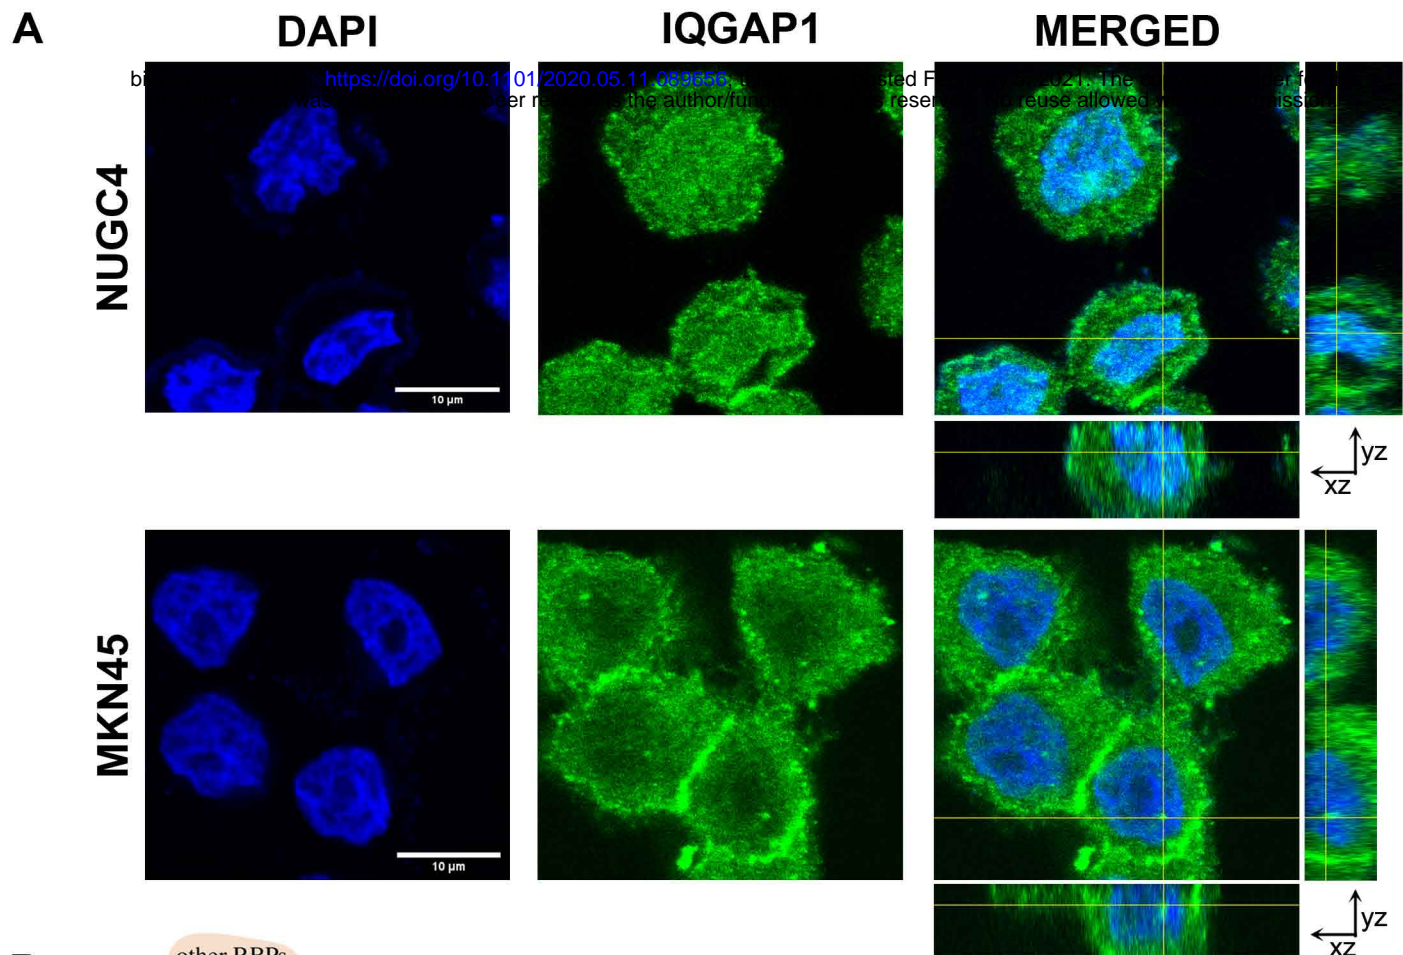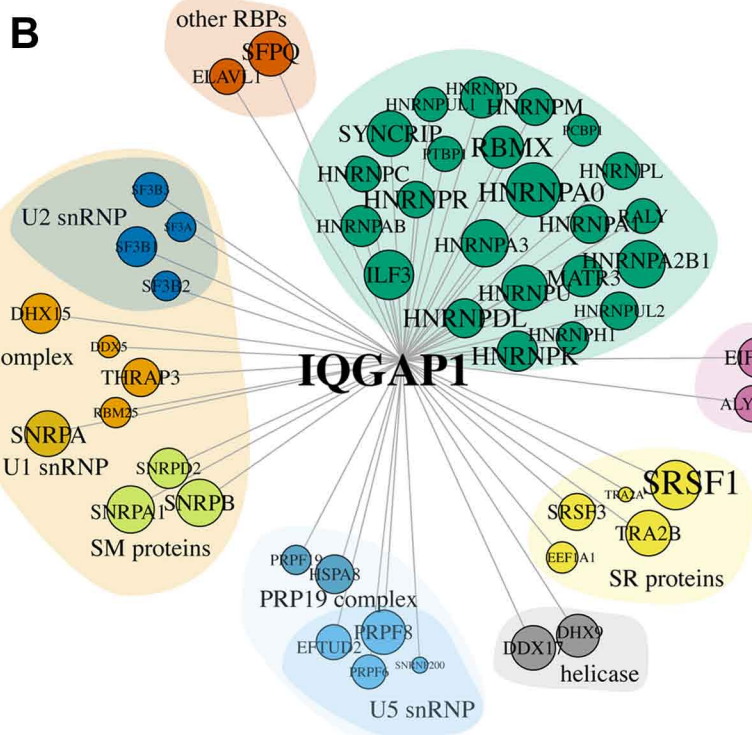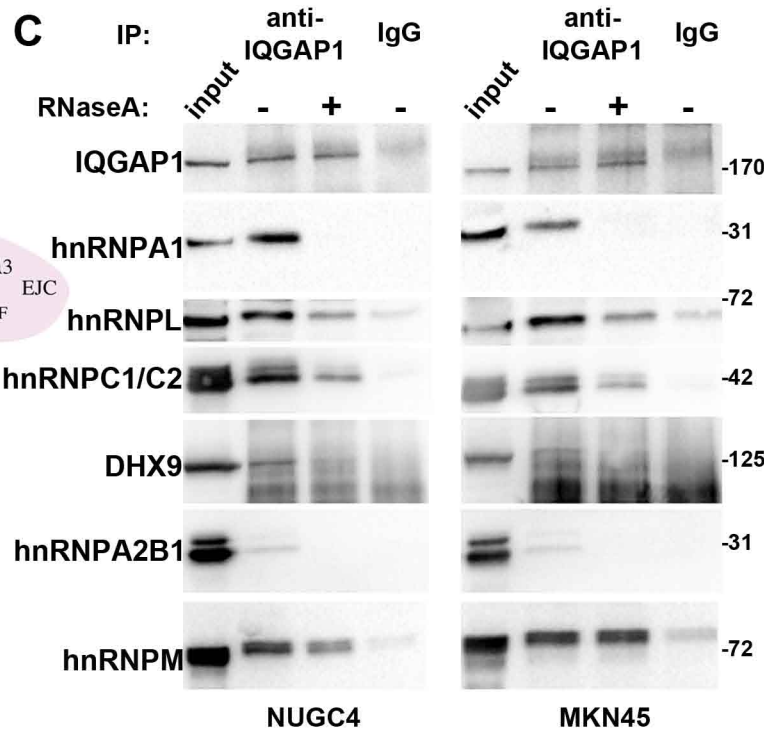

**Figure 2**



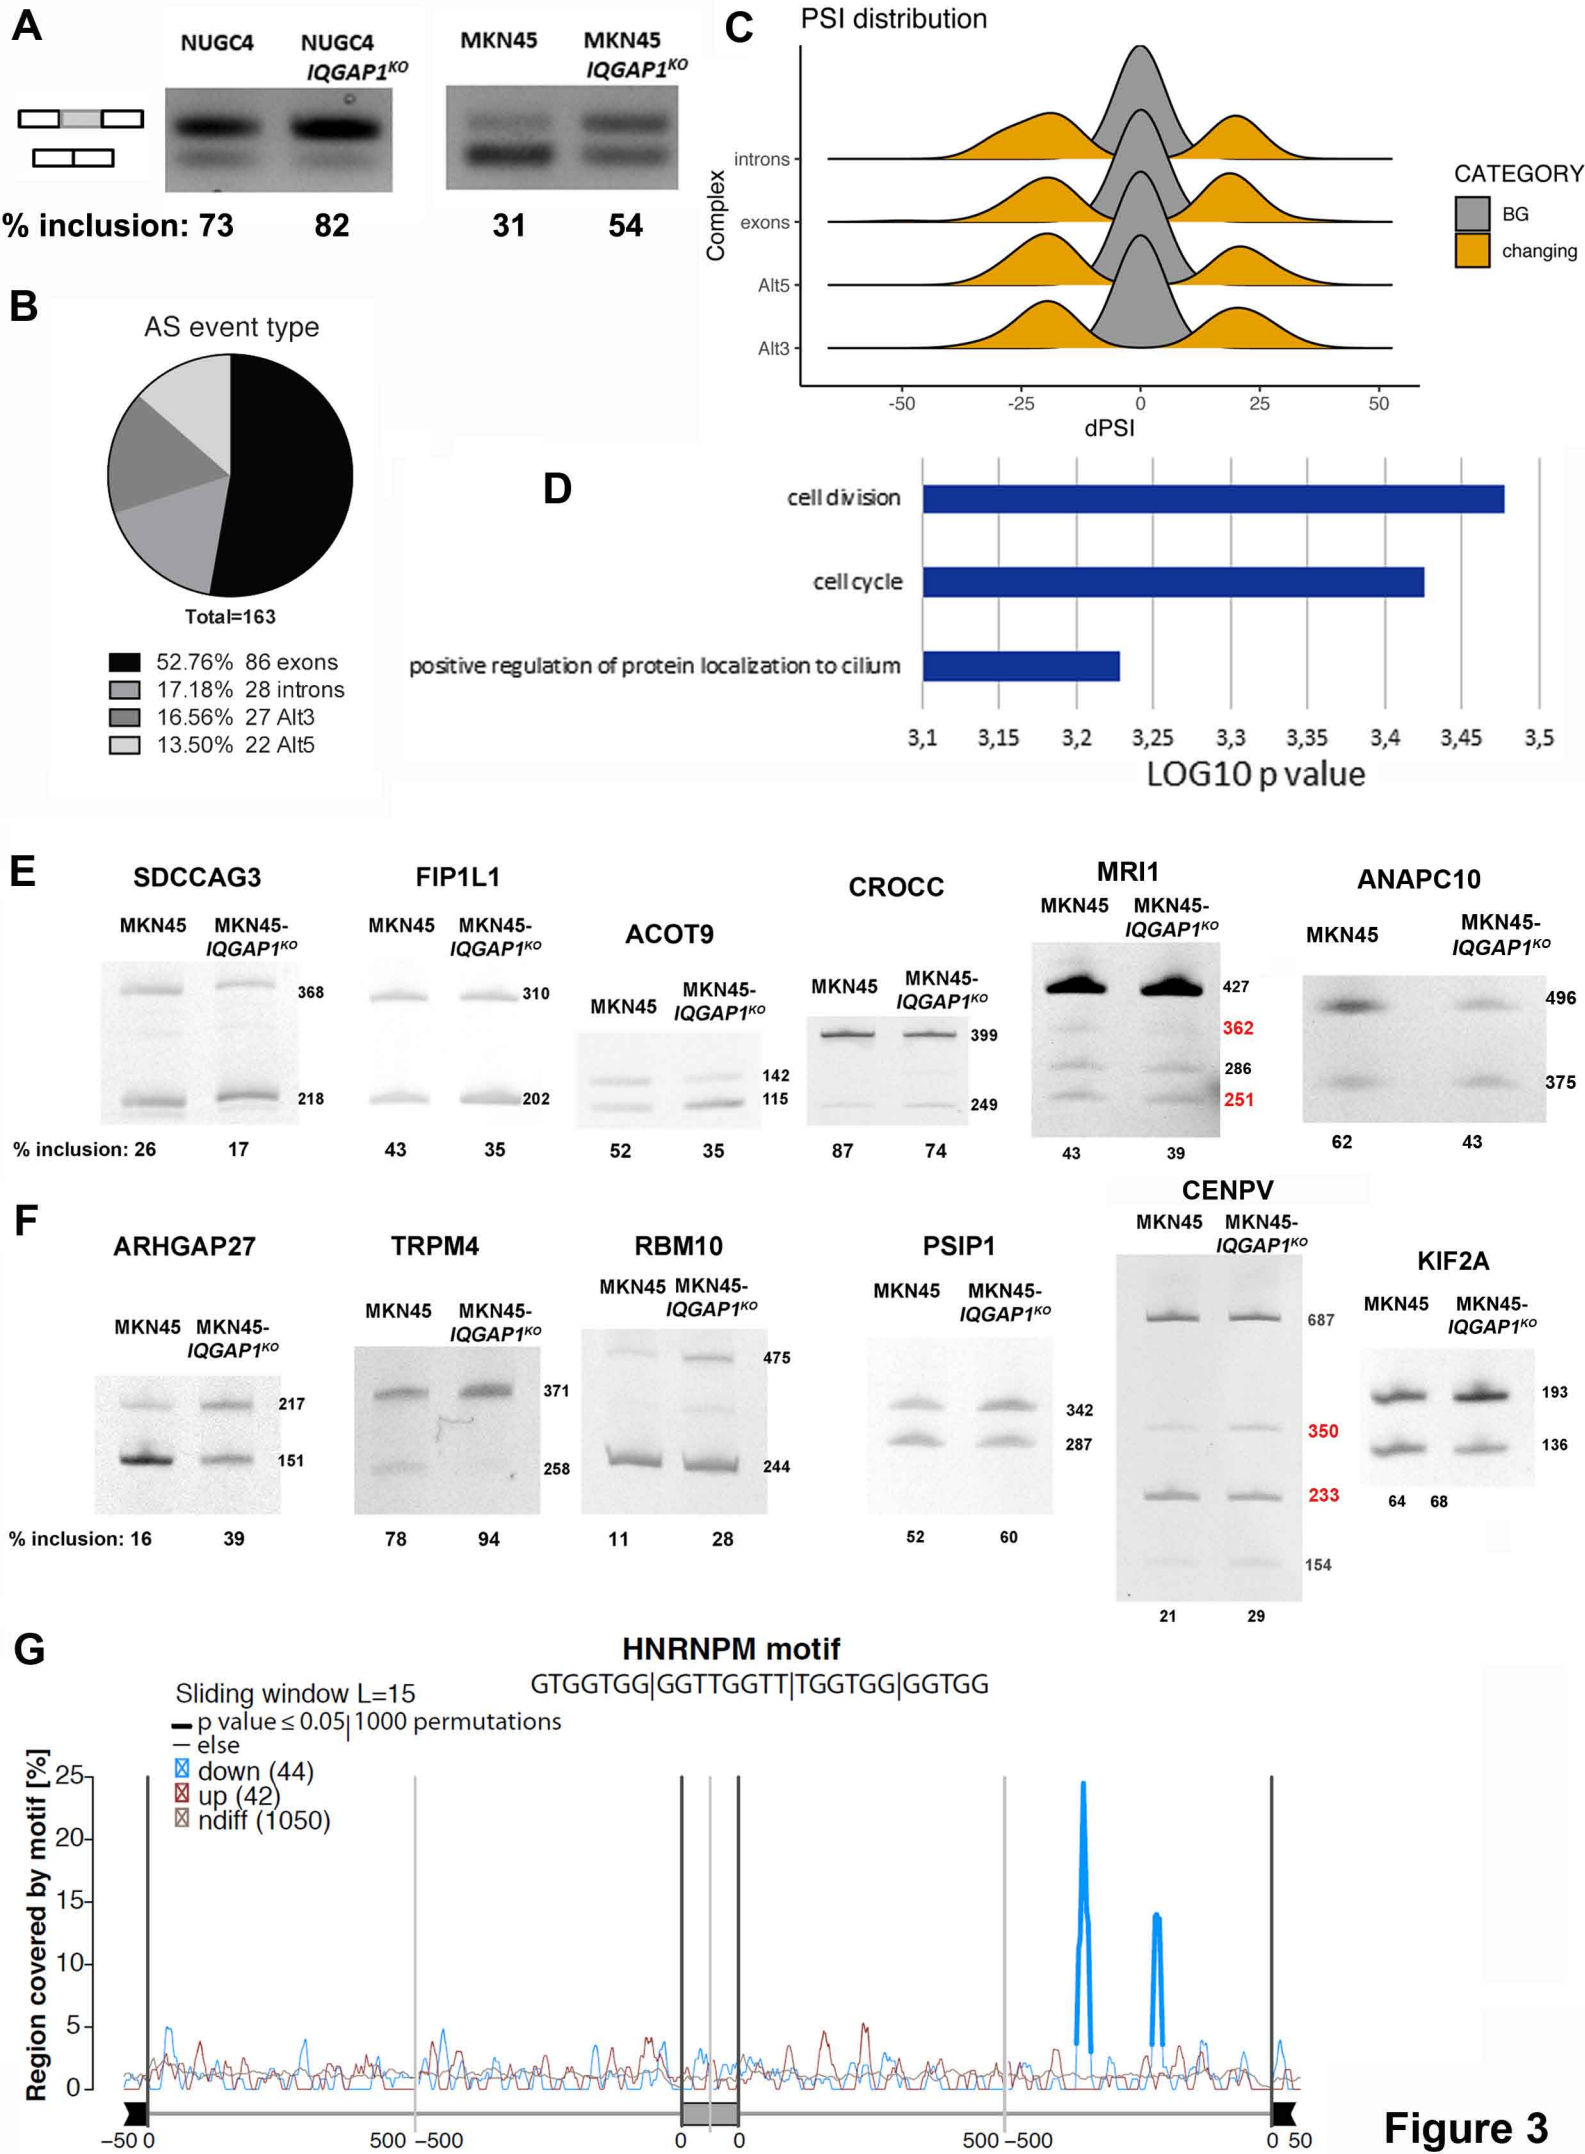

Figure 3

**A**

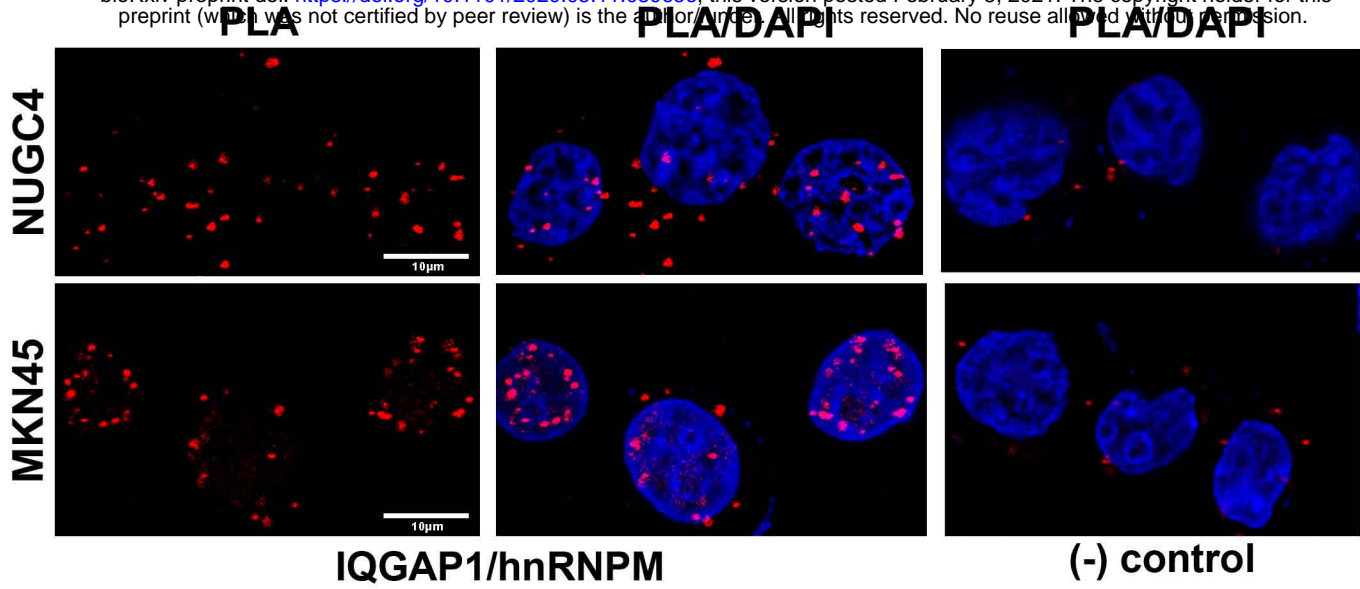

**B**

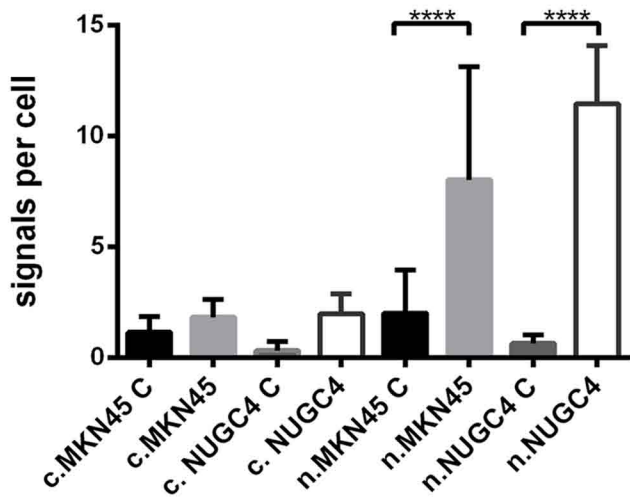

**C**

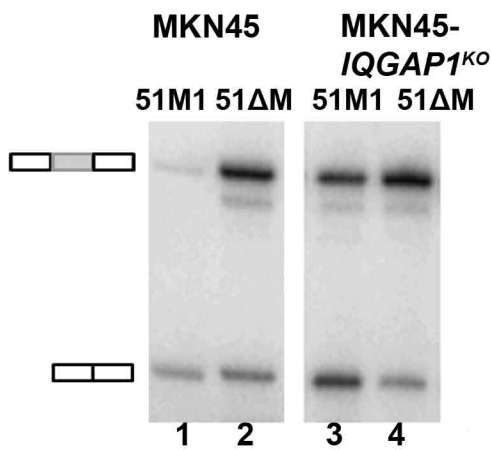

**D**

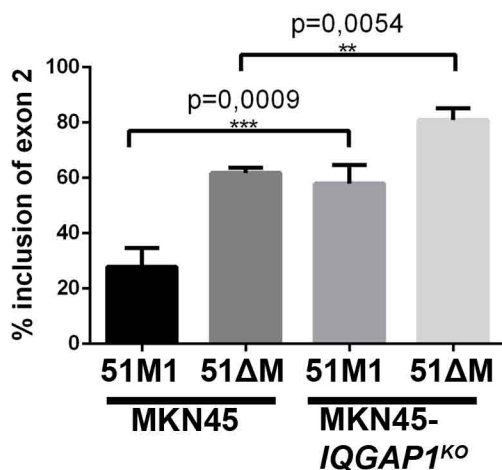

**E**

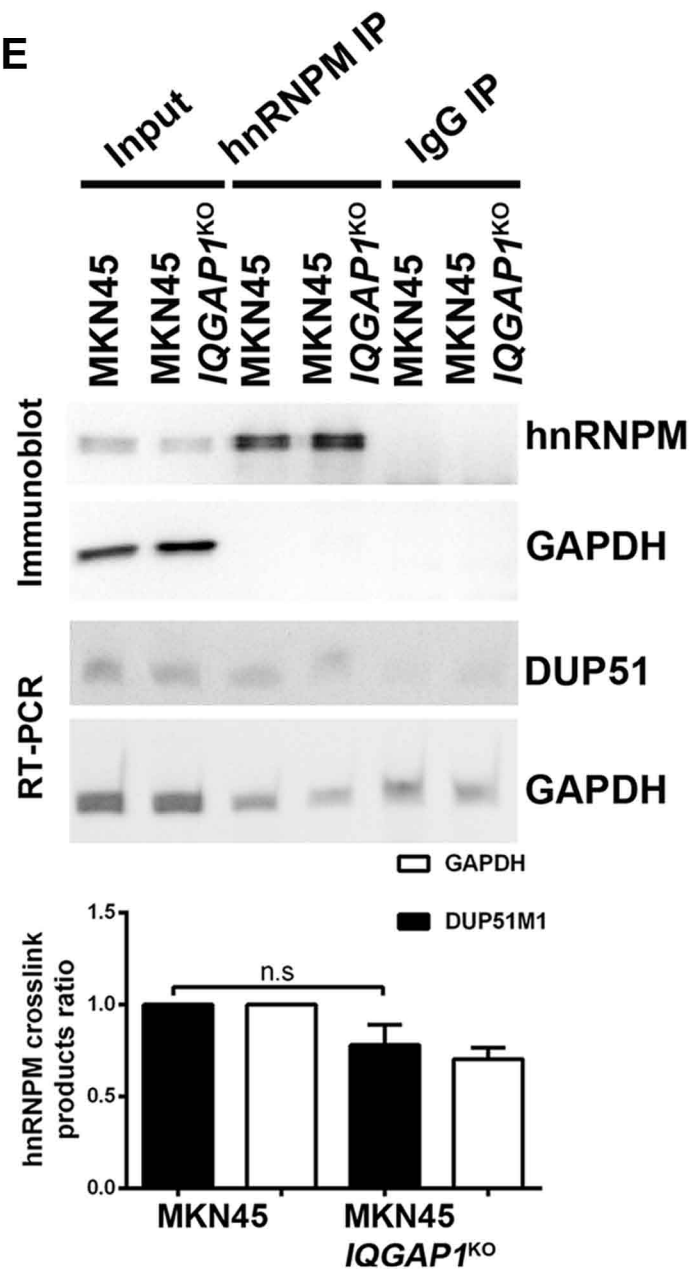

**Figure 4**

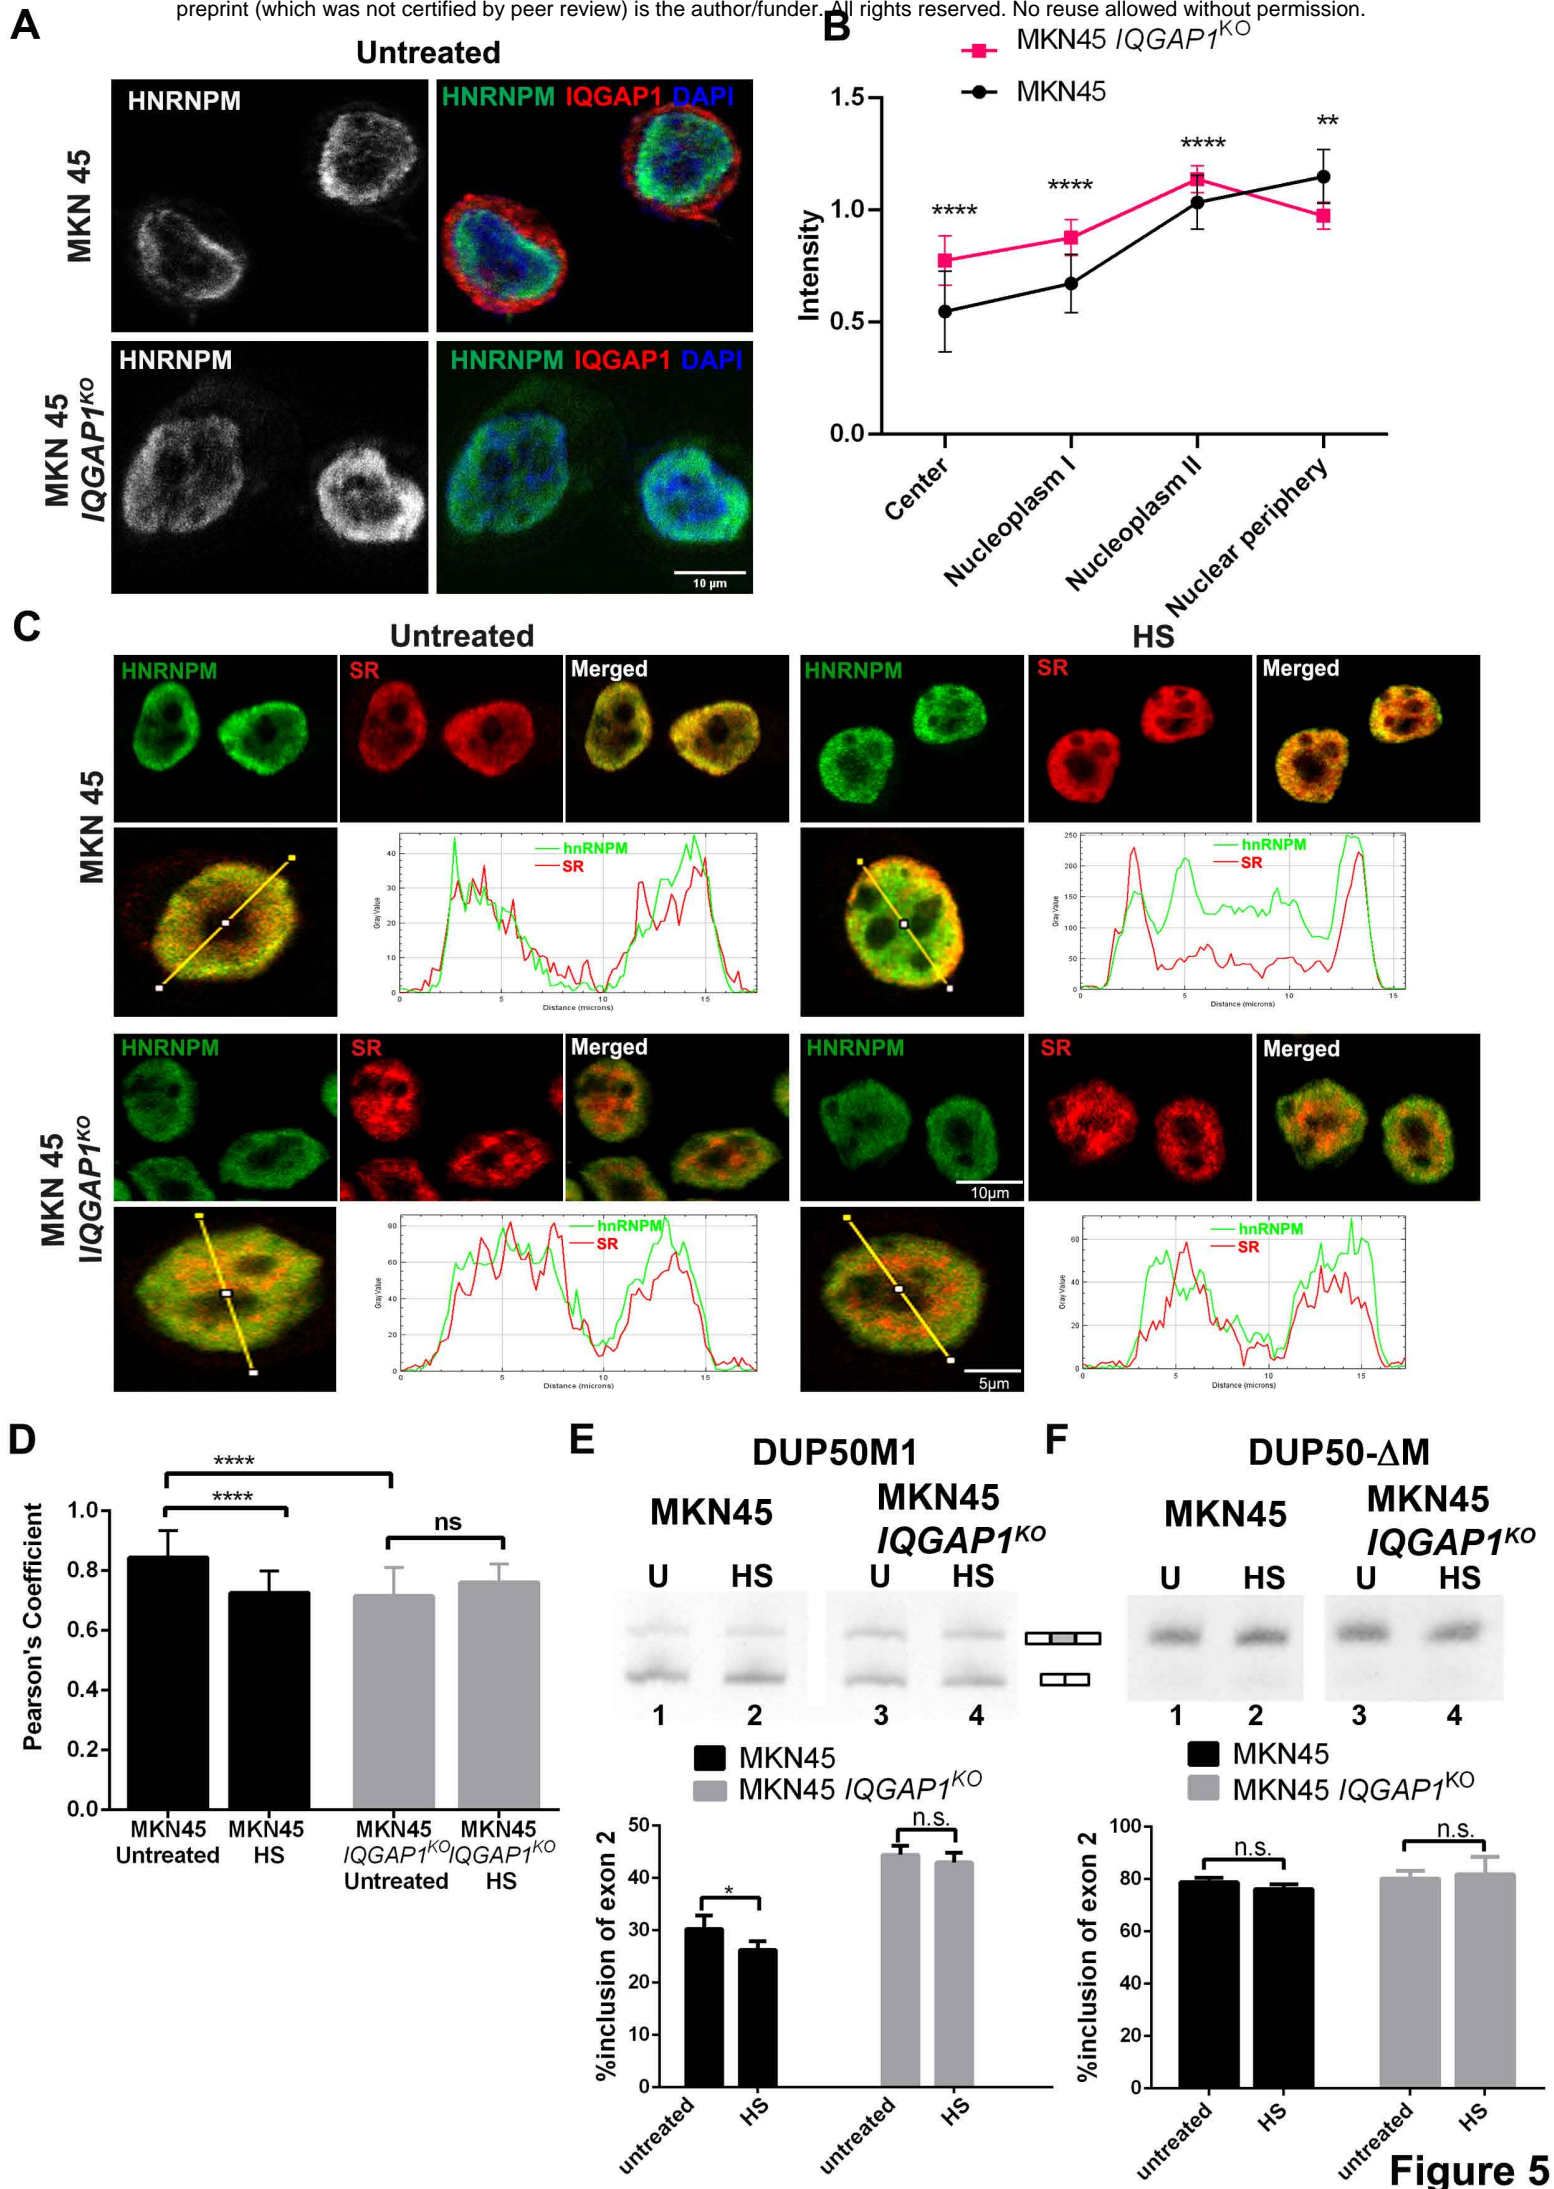

Figure 5

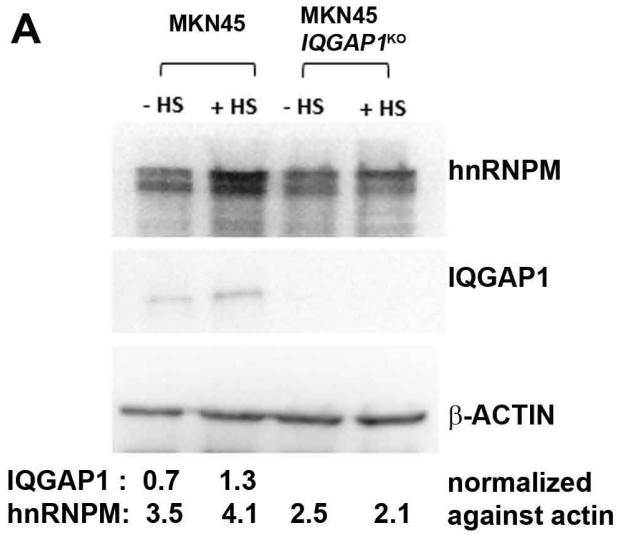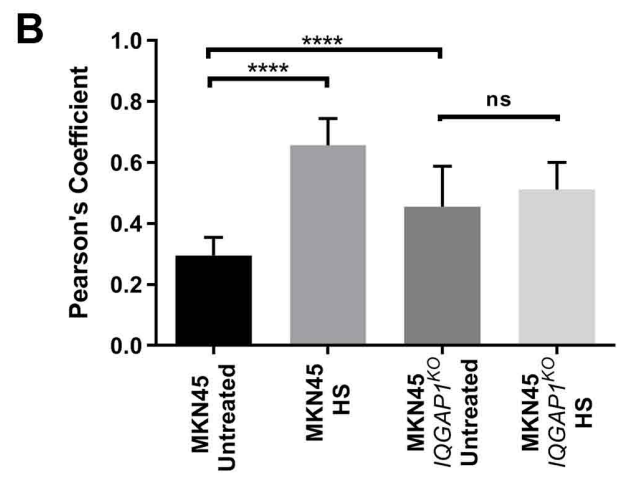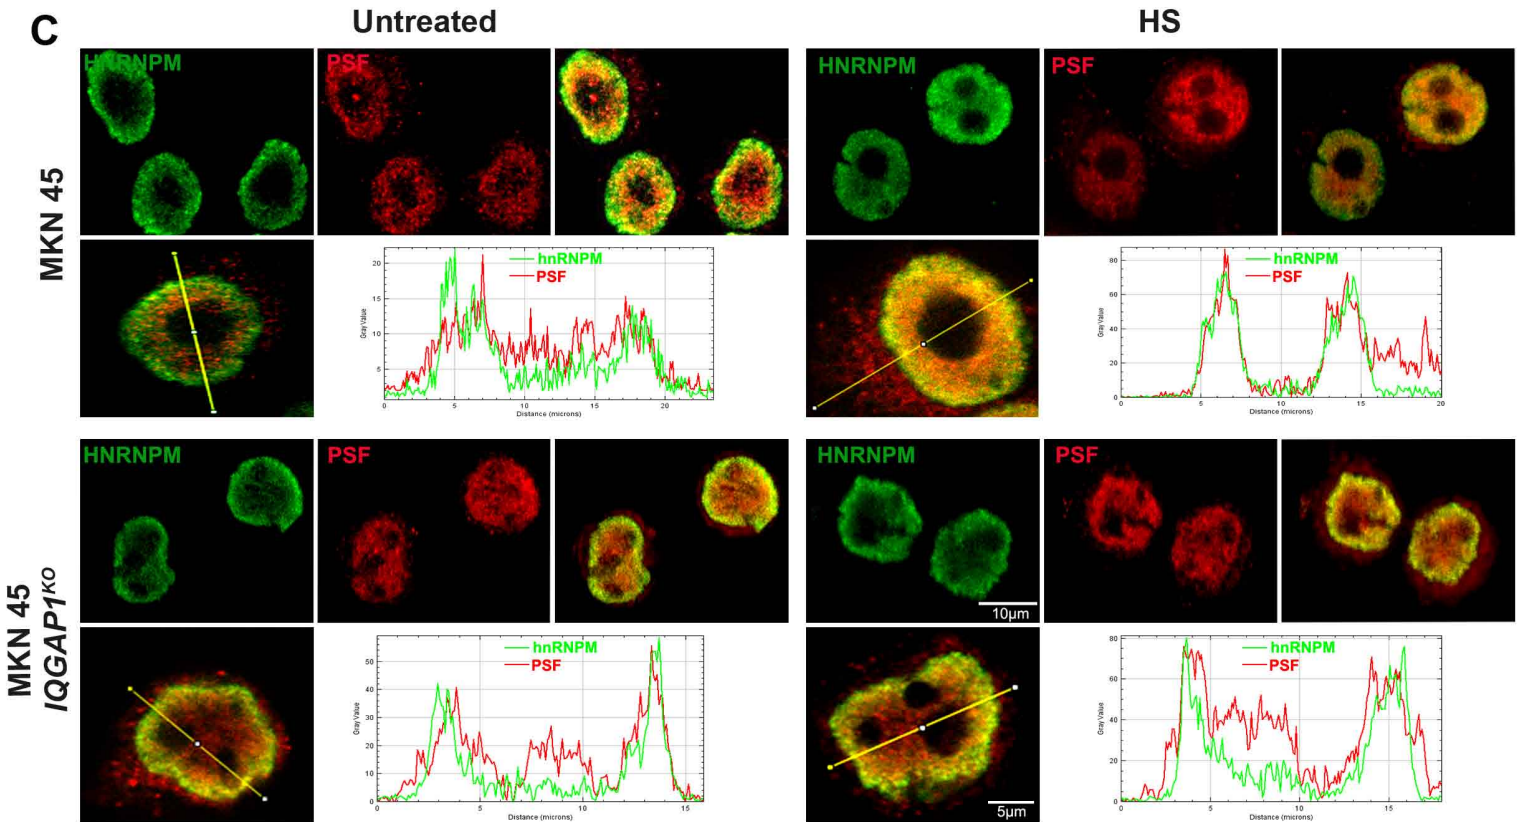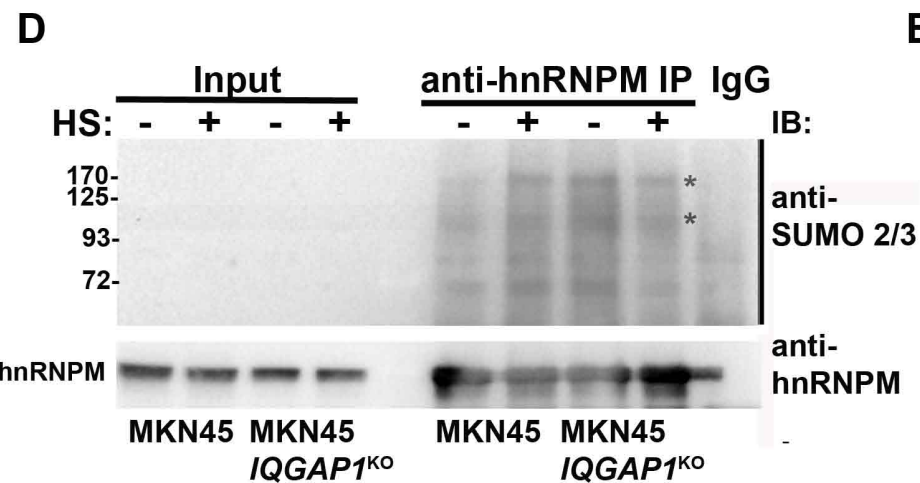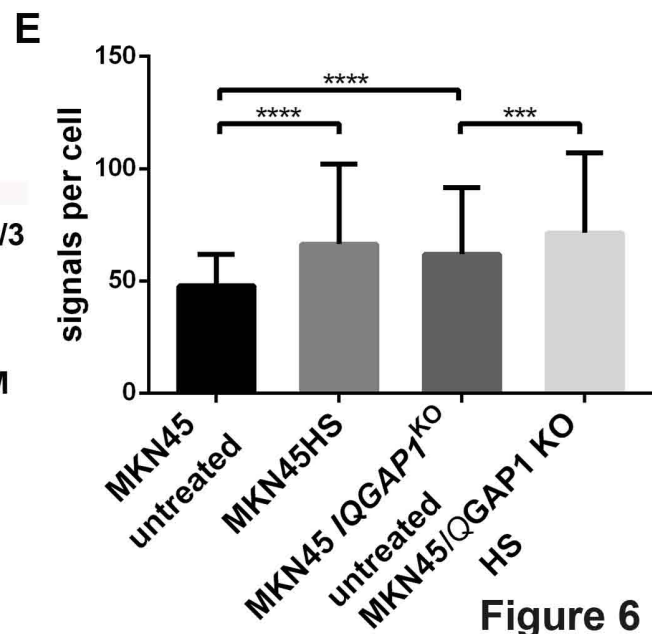

Figure 6

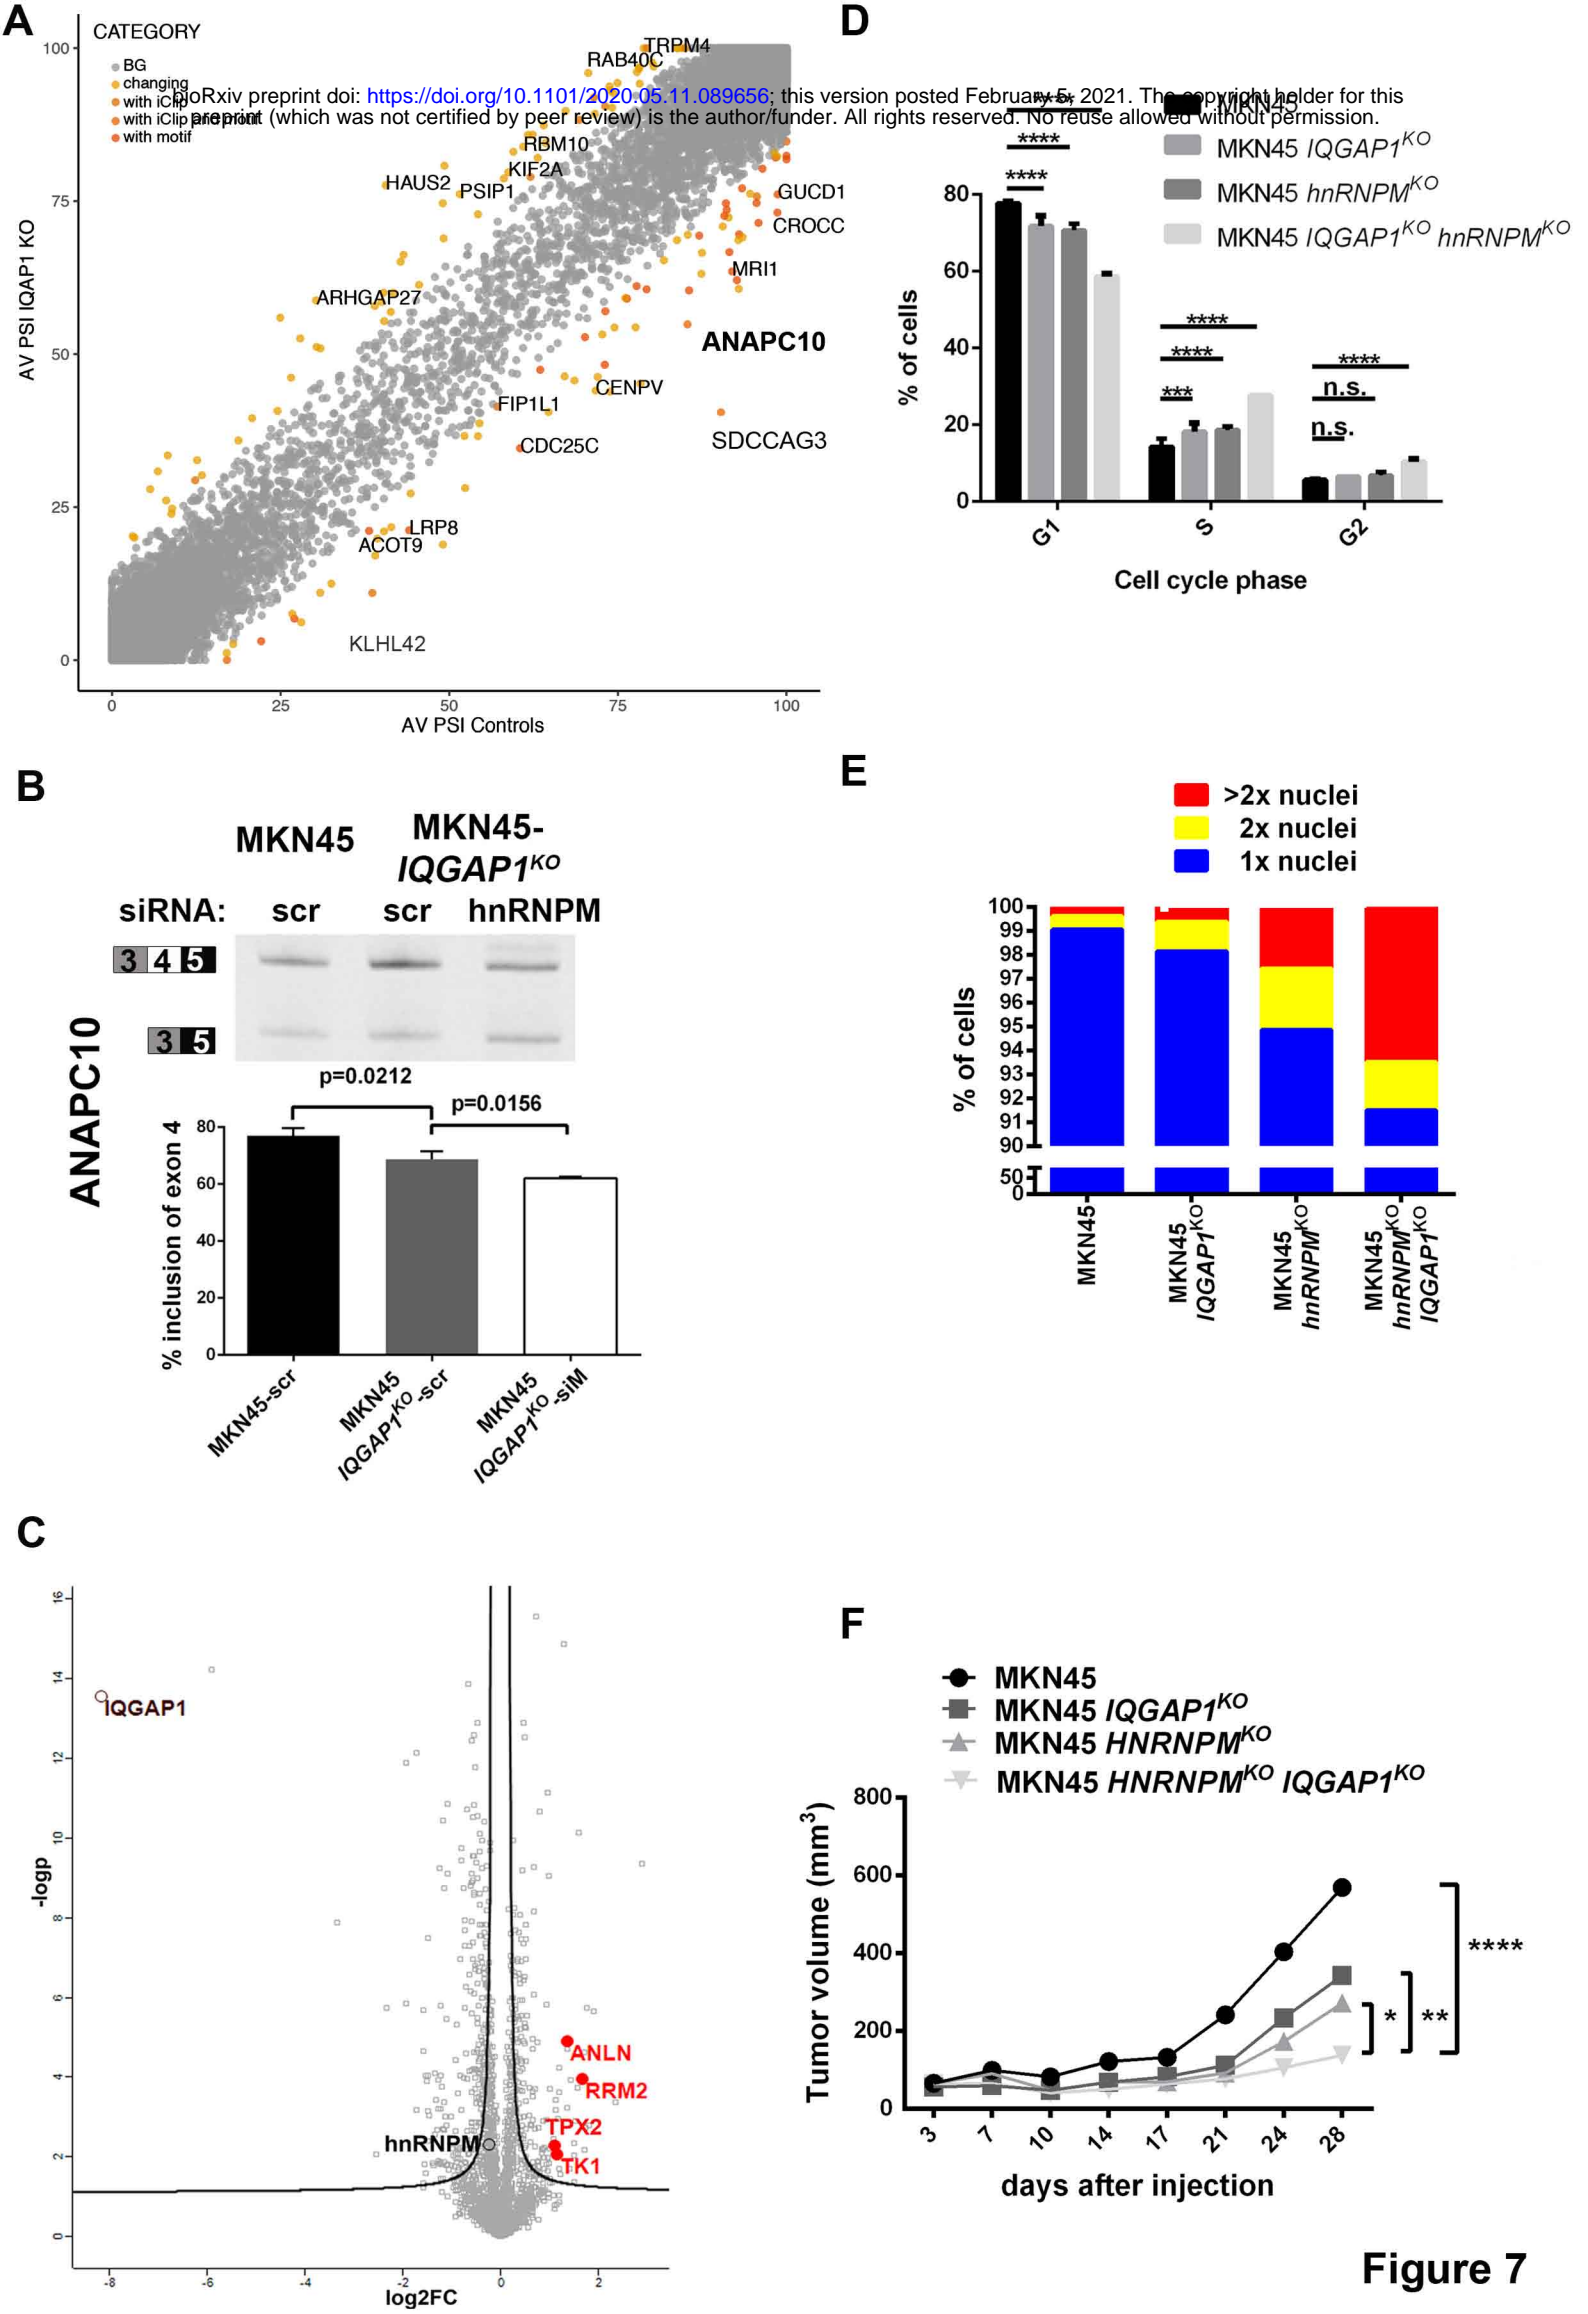

Source: https://www.biorxiv.org/content/10.1101/2020.05.11.089656v3.full.pdf
